# Supplementary material for: Hepatitis B protein HBx binds the DLEU2 lncRNA to sustain cccDNA and host cancer-related gene transcription
Source: PubMed Central journal article supplement — Gut. 2020 Feb 29;69(11):2016–24. doi: 10.1136/gutjnl-2019-319637 (PMC7569396; doi:10.1136/gutjnl-2019-319637), 2020-02-29
Supplement: gutjnl-2019-319637supp001.pdf [file gutjnl-2019-319637supp001.pdf]

## **SUPPLEMENTAL INFORMATION**

Supplemental Information includes:

- Materials and Methods section
- Modeling and Docking section
- Legends to Supplementary Figures
- 9 Supplementary figures
- 8 Supplementary tables
- Supplemental Information References

## MATERIALS AND METHODS

**Cell cultures and drug treatment.** Human hepatoma HepG2 cells, the HepG2-derived clones HepG2.2.15 and HepAD38 and the NTCP-HepG2 cells were cultured in supplemented Dulbecco's modified Eagle's medium (DMEM) as described [1] and maintained in a 5% CO<sub>2</sub> humidified incubator at 37°C.

**Primary cultures of human hepatocytes and HBV infections.** Primary human hepatocytes (PHHs) (provided by Prof. M. Rivoire, Centre Leon Bérard, Lyon, France) were prepared from HBV, HCV and HIV negative adult patients undergoing lobectomy or segmental liver resection for medically required purposes unrelated to this research program. PHHs were prepared using the protocol described in [2] with minor modifications. Liver samples were first perfused in Solution I (NaCl 58,44 M, KCl 74,56 M, Na<sub>2</sub>HPO<sub>4</sub>, 2H<sub>2</sub>O 177,99 M, Hepes 0,6%, EGTA 0,5 mM; pH7,4) and then in Solution II (NaCl 58,44 M, KCl 74,56 M, Na<sub>2</sub>HPO<sub>4</sub>, 2H<sub>2</sub>O 177,99 M, Hepes 0,6%, CaCl<sub>2</sub> 110 M) containing 0,4 mg/ml of collagenase from *Clostridium histolyticum* (Sigma-Aldrich, #C5138). Cells were seeded at 2,5x10<sup>5</sup> cells/cm<sup>2</sup> on collagen type IV pretreated plates (Corning, #354236) and cultured overnight in William's medium (Life Technologies, #22551-089) supplemented with 10% Fetal Clone II (GE Healthcare), 1% penicillin/streptomycin (Invitrogen, #15140122), 1% Glutamax X100 (Invitrogen, #35050038), 5 µg/ml insulin (Sigma-Aldrich, #I9278) and 5×10<sup>-7</sup> M hydrocortisone (Upjohn Laboratories). PHHs were then extensively washed in serum-free medium, kept in serum-free medium for 24 h to counter-select the growth of contaminating fibroblast and endothelial cells and then plated in complete William's medium. PHHs were treated with 2% of DMSO (Sigma-Aldrich, #D2650) for 24 h before HBV infection and then incubated for 16 h with a wt HBV inoculum produced in HepAD38 cells at a multiplicity of infection of 1000 vge (virus genome equivalents)/cell, in presence of 4% PEG-8000 (polyethylene glycol, Sigma-Aldrich, #1546605). In the case of the HBV (x-) inoculum cells are incubated for 16 h at a multiplicity of infection of 500 vge (virus genome equivalents)/cell. For inhibition of DLEU2 in PHHs, mixed LNA/DNA oligonucleotides (Gapmers) against human DLEU2 ncRNA were purchased from Exiqon (Cat#300600). DLEU2

specific Gapmers and scrambled control Gapmers (CTL) were delivered to cells by Gymnosis at a final concentration of 50 nM, 24h before HBV infection (MOI 100).

**HBV viral inoculum preparation and infection.** The wild type and the HBx defective (HBV (x-)) HBV inocula used in this study are concentrated as previously described [3-4] from the supernatant of HepAD38 and HepG2 H1.3Δx cells, respectively. HepAD38 is an HepG2-derived stable cell line carrying a 1.3 HBV transgene (genotype D, serotype ayw) under the control of a tet-off promoter. The HepG2 H1.3Δx cells carry a stable integration of a 1.3 fold HBV genome (Genotype D, subtype ayw) with premature stop codon mutations in both the 5' and 3' HBx ORFs. HBV (x-) [5]. HepAD38 and HepG2 H1.3Δx cells were cultured in HYPERFlask® (Corning, #10020) coated with type IV collagen (Corning, #354236) in 550 ml of complete DMEM-F12 medium supplemented with 10% decompemented FBS (Gibco, #10270-106), 1% penicillin/streptomycin (Invitrogen, #15140122) and 1% sodium-pyruvate (Invitrogen, #11360039). Supernatants (550 ml/flask) were harvested twice a week for 3-4 months, clarified through 0.45 μm and then 0.22 μm filters (Millipore, #10785534) and precipitated overnight at 4°C with 8% PEG-8000 (Sigma–Aldrich, #1546605). The precipitates were centrifuged at 3500 g for 1 h and the pellets resuspended in Opti-MEM (Invitrogen, #31985070) to achieve a 50- to 100-fold concentration. Each HBV inoculum, after DNA extraction (QIAmp Ultrasens Virus kit, Qiagen), was titered by qPCR using serial dilutions of an HBV plasmid to build a standard curve. Primers are detailed in Table S8. All viral preparations were tested to confirm the absence of endotoxins (Lonza Verviers, Belgium).

### **Patient samples**

The HCC samples (tumor and non-tumor) analysed in Figure 1g are from the 'Biobanque INSERM U1052 - CRCL Hépatologie (French IRB 'CPP Sud-Est IV' approval #11/040 / 2011). Written informed consent was obtained from each patient.

**Transient transfection of full-length HBV DNA genomes.** Monomeric linear full-length wild-type (WT) and HBx mutant (HBx mt) HBV genomes were released from the pCR.HBV.A.EcoRI and the

pCR.HBXmt.A.EcoRI plasmids [5] using EcoRI-PvuI (New England Biolabs). Linear HBV monomers were transfected into HepG2 cells using the Mirrus Bio trans IT-LT1 reagent (Mirrus, Cat#MIR2305) as previously described [1]. For inhibition of DLEU2 in HepG2 cells, mixed LNA/DNA oligonucleotides (Gapmers) were generated (Exiqon, Cat#300600) against human DLEU2 ncRNA. DLEU2 specific Gapmers and scrambled control Gapmers (CTL) were transfected at a final concentration of 40 nM cells using the Lipofectamine Plus reagent (Invitrogen Cat#11514015 and Cat#18324020).

**Western blot.** For Western blot analysis, cells were lysed and sonicated in ice-cold RIPA buffer (20 mM Tris-HCl pH 8.0, 300 mM NaCl, 10% glycerol, 0,2% NP-40) supplemented with protease inhibitors (Roche). For immunoprecipitation experiments, cells were lysed in NET lysis buffer (50 mM Tris-HCl pH 7,5, 150 mM NaCl, 1 mM MgCl<sub>2</sub>, 0,5% NP-40, 0,01% NaN<sub>3</sub>) with protease inhibitors (Roche). Immunoprecipitations were performed on 1 mg of protein extracts using anti-HBx antibody (ThermoFisher, Cat#MA1-081) over night at 4 °C. G Plus agarose beads (50 µl slurry for IP, Pierce cat. #22851) were added for 1 h at 4 °C. Immunocomplexes were washed 3 times with NET buffer 2 (50 mM Tris-HCl pH 7,5, 150 mM NaCl, 1 mM MgCl<sub>2</sub>, 0,1% NP-40, 0,01% NaN<sub>3</sub>) and eluted in Laemmli sample buffer. Protein lysates were separated on sodium dodecyl sulfate (SDS) polyacrylamide gel electrophoresis gels and transferred onto nitrocellulose membranes. After probing with the different primary antibodies (anti-HBx ThermoFisher, cat#MA1-081 or Abcam cat#ab39716, anti EZH2 CST cat#5246S, anti Suz12 CST cat#3737S, anti-actin CST cat#4970S) and horseradish peroxidase-coupled secondary antibodies, chemoluminescence signals were captured with the ChemiDoc Imaging System (Bio-Rad).

**ChIP assays.** Cells were resuspended in 1-2 ml of ChIP lysis buffer (50 mM Tris HCL, pH 8, 0,5% NP40, 1 mM EDTA, 100 mM NaCl) and incubated 10 min at 4°C. The lysates were centrifuged at 10.000 g for 2 minutes to pellet the nuclei. The supernatants were removed, and the nuclei fixed in 1% formaldehyde for 30 min at 4°C. Isolated cross-linked nuclei were extracted with a 20 mM Tris, pH 8, 3 mM MgCl<sub>2</sub>, 20 mM KCl buffer containing protease inhibitors, pelleted by microcentrifugation,

and lysed by incubation in SDS lysis buffer (1% SDS, 10 mM EDTA, 50 mM Tris-chloride, pH 8,1) containing protease inhibitors. The chromatin solution was then sonicated for 5 pulses of 45 s at 80% power to generate 300- to 1000-bp DNA fragments using a Bioruptor Sonicator (Diagenode Inc). One hundred  $\mu$ l of Dynabeads Protein G (Invitrogen, Cat#10003D) were added to each 1 ml chromatin preparation and incubated on a rotator for 14–16 h at 4°C. The antibodies used were anti-HBx (ThermoFisher, Cat#MA1-081), anti-Pol II (Diagenode, Cat#C15200004), anti-AcH4 (Millipore, Cat#06-866), anti-Histone H3 (trimethyl K27) (Abcam, Cat#6002), anti-CTCF (Diagenode, Cat#C15410210-50); anti-EZH2 (Active Motif, Cat#39002) anti-SUZ12 (CST cat#3737S). Immunoprecipitations with nonspecific immunoglobulins (Santa Cruz Biotechnology Inc.) were included in each experiment as negative controls. After the reverse cross-linking, immunoprecipitated chromatin was purified by phenol/chloroform (1:1) extraction associated to Phase Lock Gel (5 Prime, Cat#2302820) and ethanol precipitation. ChIPed chromatin was analyzed by real-time PCR using either primers (NCC1 and CCCAS) and probes (FL and Red) specific for the HBV cccDNA or specific primers for each gene promoter (Table S8).

**HBV and cellular mRNAs.** Total RNA was extracted from using the TRIzol reagent (Invitrogen) as recommended by the manufacturer. Nuclear and cytoplasmic extraction was performed using the PARIS KIT (Ambion, Cat#AM1921). RNA samples were treated with RQ1 RNase-Free DNase (Promega, Cat#M6101) for 30 min at 37°C and stored until use. RNA quality and quantity were monitored by ethidium bromide staining and UV absorbance. For HBV pgRNA analysis, 2  $\mu$ g of DNase-treated RNA was reverse transcribed and amplified using the ThermoScript RT-PCR System (Invitrogen, Cat #11146016). Then 2  $\mu$ l of each cDNA was quantified by real-time PCR analysis (Light Cycler; Roche Diagnostics) using the pgRNA-specific primers and probes indicated in Table S4. The human Beta Actin housekeeping gene Light Cycler Set (Roche Diagnostics) was used to normalize the RNA samples. Cellular mRNAs levels were assayed, after reverse transcription (ThermoScript, Invitrogen, Inc., Carlsbad, US-CA) using random primers, by PCR using MyTaq™ HS DNA Polymerase (Bioline, Cat#BIO-21111) and by quantitative qPCR using the specific TaqMan

FAM-probes (Applied Biosystems, Inc.) and the specific primers listed in Table S8. Results were normalized to human Beta Actin and human GAPDH.

**RNA immunoprecipitation (RIP).** RNA immunoprecipitation was performed using  $10^6$  HepG2 or HepG2-NTCP cells or primary human hepatocytes per antibody condition. Nuclear pellets were fixed in 1% formaldehyde for 15 min, resuspended in 1 ml freshly prepared RIP buffer (50 mM KCl, 25 mM Tris pH 7.4, 5 mM EDTA, 0.5 mM DTT, 0.5% NP40, 100 U/ml RNase inhibitor SUPERASin, Protease Inhibitor Cocktail) and split into two fractions of 500  $\mu$ l each (noA and IP). Mechanic shearing was then performed using a dounce homogenizer with 15–20 strokes. After centrifugation at 13,000 rpm for 10 min, supernatants were transferred into new Eppendorf tubes and 1% of the total volume was removed and collected as input RNA. To couple the antibodies to the Dynabeads™ Protein G (Invitrogen), 10 ng of anti-HBx or anti-EZH2 were added to 50  $\mu$ l of beads resuspended in 1ml of Antibody coupling buffer (3% BSA, Protease Inhibitor Cocktail (Roche)) overnight at 4°C, one day prior to the RIP assay. To remove the uncoupled antibodies, beads were washed thrice with the Antibody coupling buffer and equilibrated in 100 $\mu$ l of Antibody coupling buffer. Pre-cleared nuclear lysates were next incubated overnight at 4°C with the beads coupled to the indicated specific antibody or non-specific antibody. Flow through and 5% of the beads was stored for SDS analysis. After three washes in RIP buffer, the beads were subjected to Proteinase K treatment in the Reverse cross-linking buffer [100 mM NaCl, 10 mM Tris-HCl pH 7.0, 1 mM EDTA, 0.5% SDS, 1 mg/ml Proteinase K (Euromedex)] at 50°C for 1 hour.

Finally, co-precipitated RNAs and the input were extracted by TRIzol and eluted with nuclease-free water. Reverse transcription of DNase-treated RNA was performed with Velo (Invitrogen, Inc., Carlsbad, US-CA) according to manufacturer's instructions. cDNA was used to amplify the DLEU2 regions and MALAT1 and Beta Actin.

**RNA pull-down.** RNA pull-down was performed using Pierce™ Magnetic RNA-Protein Pull-Down Kit (Thermo Scientific; cat.no 20164) using 100 pmol of 3'-end-desthiobiotinylated DLEU2 RNAs (Pierce™ RNA 3' End Desthiobiotinylation Kit. Thermo Scientific cat. 20163), 0.5, 0.75, 1 or 1.5  $\mu$ g

of HBx recombinant purified protein (Prospec cat. HBV-271) and 1.2, 2, 2.5 or 7.5  $\mu\text{g}$  of EZH2 recombinant purified protein (Origene cat. TP302054) following manufacturer's instructions. RNAs containing or not the binding sites of HuR protein, provided in the kit, were used as controls.

**Chromatin Isolation by RNA Purification (ChIRP).** Antisense DNA probes were designed against DLEU2 isoforms using an online designer at <https://www.biosearchtech.com/support/tools/design-software/chirp-probe-designer>. Forty-eight hours after transfection with linear HBV monomers, HepG2 nuclear pellets were crosslinked in presence of 1% glutaraldehyde in PBS for 10 min at room temperature by shaking and then quenched with 0.125 M glycine for 5 min. The pellets were washed in PBS, freeze-dried in liquid nitrogen and stored at  $-80^{\circ}\text{C}$ . Pellets were resuspended in 1 ml lysis buffer (50 mM Tris HCl pH 7, 10 mM EDTA, 1% SDS, 1mM PMSF, 100 U/ml RNAase inhibitor (Sigma, Cat #AM2696), protease inhibitor cocktail (PIC, Sigma, Cat #P8340). Chromatin was sonicated by Bioruptor (Diagenode) in a cold room using the following parameters: pulse interval 30 s ON and 45 s OFF, until DNA was in the size range of 100–500 bp. From each condition 10  $\mu\text{l}$  were taken and preserved as DNA/RNA input. Probe hybridization to chromatin was performed using the hybridization buffer (750 mM NaCl, 50 mM Tris-HCl 7.0, 1 mM EDTA, 1% SDS, 15% formamide, PMSF, protease inhibitor cocktail, and RNase inhibitor). DLEU2 probes (100 pmol) were added to chromatin, mixed by rotation at  $37^{\circ}\text{C}$  overnight. One hundred  $\mu\text{l}$  of washed streptavidin magnetic C1 beads (Invitrogen) were added per 100 pmol of probes and incubated for another 30 min at  $37^{\circ}\text{C}$ . Beads/biotin-probes/RNA/chromatin complexes were collected, washed 5 times with wash buffer (2X SSC, 0.5% SDS and PMSF). RNA was extracted after treatment by proteinase K buffer (100mM NaCl, 10mM Tris HCl pH7.5, 1mM EDTA, 0.5% SDS and PMSF, protease inhibitor cocktail, and RNase inhibitor) with phenol:chloroform extraction and ethanol precipitation. The RNA was analyzed by quantitative reverse-transcription PCR (qRT-PCR). Bound DNA was purified by phenol:chloroform (1:1) extraction associated to Phase Lock Gel (5 Prime, Cat#2302820) and ethanol precipitation and analyzed by real-time PCR amplification using specific primers and LightCycler 480 SYBR Green I Master (Roche) (Table S8).

**NanoString nCounter lncRNA gene expression assay and data analysis.** NanoString nCounter assays were performed using 100 ng of purified RNA following manufacturer's instructions (NanoString Technologies). The long non-coding RNA probe set was selected from the custom probe set. Sample preparation and hybridization reactions were performed according to manufacturer's instructions (NanoString Technologies). All hybridization reactions were incubated at 65°C for a minimum of 16 h. Hybridized probes were purified and counted on the nCounter Prep Station and Digital Analyzer (NanoString Technologies) following the manufacturer's instructions. For each assay, a high-density scan (600 fields of view) was performed. Data analysis was performed using the nSolver analysis software (NanoString Technologies) (<https://www.nanostring.com/products/analysis-software/nsolver>) and housekeeping genes were used for data normalization.

**Digital droplet PCR (ddPCR).** A 22- $\mu$ L reaction mixture was prepared comprising 11  $\mu$ L of 2X ddPCR Supermix™ for probes (no dUTP) (Bio-Rad), 1.1  $\mu$ L of primers and probe mix, and 5  $\mu$ L of cDNA or DNA. Nucleic acid inputs were adjusted to have acceptable negative events: 10ng for pgRNA duplex PCR, 50ng for cccDNA singleplex PCR and 100ng for DLEU2 duplex PCR. The several PCR in duplex were done combining DLEU2 gene (intron or exon) with the human control GUSB gene (#Hs99999908\_m1, Thermofischer) for cDNA, HBV (Pa03453406\_s1, Thermofischer) with the human control HBB gene (#Hs00758889\_s1, Thermofischer) for DNA, pgRNA (Forward primer ggagtggtgattcgactcct, reverse primer agattgagatcttctgac and probe aggcaggtcccctagaagaagaactcc) with the human control GUSB gene (#Hs99999908\_m1, Thermofischer) for cDNA and the singleplex cccDNA (forward primer ccgtgtgacttcgctca, reverse primer gcacagcttgaggcttga and probes catggagaccacgtgaacgccc). Droplet formation was carried out using a QX100 droplet generator. Subsequent amplification was performed in the C1000 Touch™ deep-well thermal cycler (Bio-Rad) with a ramp rate of 2 °C/s and the lid heated to 105 °C, according to the Bio-Rad recommendations. First, the enzyme was activated at 95 °C for 10 min followed by 40 cycles of denaturation at 94 °C for 30 s and 60 °C for one minute. The enzyme was deactivated at 98 °C for 10 min and the reaction was kept at 4 °C.



**In silico modeling. a) Structure.** The FASTA sequence of DLEU2 intron 1 (selected region of 439 bp), as given by GenomeBrowser (<https://genome.ucsc.edu/cgi-bin/hgGateway>), was used to obtain the secondary structure via DotKnot [6,7]. The FASTA sequence and the secondary structure were used to obtain the tertiary structure via the RNAcomposer tool [8]. Secondary structure predictions for HBx, based on amino acid sequence, have been performed with IUPred [9] (<http://iupred.enzim.hu/>), PONDR [10] (<http://www.pondr.com/>) and DISOPRED2 [11] ([http://bioinf.cs.ucl.ac.uk/web\\_servers/disopred/disopred\\_overview/](http://bioinf.cs.ucl.ac.uk/web_servers/disopred/disopred_overview/)). The HBx structure has been modelled by I-TASSER [12-14] (<https://zhanglab.ccmb.med.umich.edu/I-TASSER/>), including in the modelling the constraints on cysteine linkages (default parameters values for the homology modeling has been used; pairs of constrained cysteines are C7-C69, C17-C143, C61-C115, C78 -C137). **b) Interaction.** The interaction probabilities for HBx-DLEU2, based on the nucleotide sequence, have been evaluated with the methods RPISeq [15] (<http://pridb.gdcb.iastate.edu/RPISeq/>) and catRAPID [16,17] ([http://s.tartaglialab.com/page/catrapid\\_group](http://s.tartaglialab.com/page/catrapid_group)). RNA-binding residues in HBx were predicted via RNABindRPlus [18] (<http://ailab1.ist.psu.edu/RNABindRPlus/>), based on the amino acid sequence. HBx protein and RNA models were docked by using HEX [19] (<http://hex.loria.fr/>) and NPDock [20-22] (<http://genesilico.pl/NPDock>) for the preliminary screening and determination of the interface residues, and by using HADDOCK [23,24] for a more refined, interacting-residues driven docking.

### Statistical Analysis

Data were imported from TCGA Firebrowse APIs (<http://www.firebrowse.org/api-docs/>). Transcripts per Millions (TPMs) were calculated from RSEM matrixes with the formula  $TPM = \text{scaled, estimate} \times 10^6$ . Visualizations were built via custom R scripting (ggboxplot, ggpaired functions of gplots package). Boxplots follow standard representation, with the main box representing the Interquartile range and the middle line representing median values. TPM values of single RNAs in Figure 5 (a,c) and in Figure S7 were computed via unpaired t-tests. For the Venn Diagram in Fig. 5b, the genes whose expression was positively correlated with the expression of DLEU2 or EZH2 in

the TCGA-LIHC dataset were extracted via the R2 platform (<https://r2.amc.nl>) with the function "Find correlated Genes with a Single Gene", then intersecting the resulting lists via custom R scripting with the list of genes identified as HBx direct target genes by ChIP-Seq. Kaplan-Meier curves and survival fits were computed via the R2 web portal (<http://r2.amc.nl>), by setting the highest survival censorship to 60 months, and partitioning the dataset by each RNA median value.

For the rest of the data, the statistical analyses were performed using GraphPad Prism version 6.00 GraphPad Software, La Jolla California USA, (<https://www.graphpad.com/scientific-software/prism/>). The data are presented as average  $\pm$  SD. P values were determined using unpaired t-test. P values  $\leq 0.05$  were considered statistically significant. Additional details can be found in the Legends to figures.

## MODELING AND DOCKING

### (a) RNA structure modelling

Experimental structures of lncRNAs are scarce [25] and methods to predict *de novo* RNA/lncRNA structures are subject of intense and challenging investigation [26-28], at the edge of the RNA research.

We modeled a portion of intron 1 (a selected region of 439 bases) starting from the FASTA sequence (<https://genome.ucsc.edu/cgi-bin/hgGateway>). We first obtained the secondary structure via DotKnot [6,7], a hybrid heuristic algorithm, based on sequence matching and free energy minimization. The algorithm is overall faster than methods based on free energy minimization only, that can become unaffordable for long sequences [29]. It performs a preliminary detection of pseudoknots, used in a second step during the secondary structure prediction. Pseudoknot structures can become important for long RNAs, in particular in relationship with transcription and regulatory activities [30] (Figure S5).

The FASTA sequence and the secondary structure were used to obtain the 3D structure of intron 1 (Figure 3) via the RNAcomposer tool [8], a method based on a machine translation principle. RNAcomposer has been tested for high resolution large RNA structure prediction [27,28] starting from a user-defined secondary structure. It allows to model up to 500 residues, therefore it is suited for the large intron considered here.

### (b) HBx structure modelling

HBx is a small protein (154 aa), with subdomains devoted to different functions [31]. It is a partially disordered protein (hybrid type Intrinsically Unstructured Protein, IUP), as it contains some 10% of helices and some beta turns (in the globular part), coexisting with disordered coils. HBx disordered nature makes challenging to determine its structure via NMR or X-rays, therefore few information on the three-dimensional structure is available. It is known that the presence of nine cysteines in the amino acid sequence lead to the formation of four disulfide bonds, which role is to stabilize and to control the protein function [32]. In this work, the HBx structure has been modelled by I-TASSER [12-14], including in the modelling the constraints on cysteine linkages. Due to the partial IU nature of HBx, scores for the homology structures obtained are not high (from -4.25 to -5). We selected the

most stable structure to be used for docking (Figure S4a); however, the best five structures modelled by I-TASSER share the same overall secondary structure and the presence of the globular and the disordered subdomains.

The 3D structure obtained via I-TASSER compares well with the degree of intrinsic disorder predictions (Figure S4b) based on the primary amino acid sequence, as given by IUPred [9], and PONDR [10], that predicts disorder only in the first part of the sequence. Results from I-TASSER modelling are also in very good agreement with prediction of secondary structure elements (Figure S4c) from DISOPRED2 [11], while our model is different from a previous 3D model [33], not including constraints on cysteines.

### **(c) Sequence-based interaction methods**

We estimated the interaction probabilities for the HBx-lncRNAs with various tools based on primary sequences analysis.

Based on the HBx protein sequence only, the RNABindRPlus [17] method identifies residues with higher interacting propensity for RNA, highlighted on the modelled HBx tertiary structure (Figure S5a). Residues with the highest interaction scores are located in the disordered region, with some exception in the loops in the globular part.

We used catRAPID [16,17], a method providing information on protein-RNA interaction, to study HBx interaction with intron 1. According to catRAPID, a large portion of intron 1 (~19000 nucleotides, including the primers) interacts with both HBx (global score of 0.98 over 1.00) and with EZH2 (global score of 1.00). To assess positive and negative controls, we investigated the interaction of MALAT1 (full and partial sequence) with HBx and EZH2. The complete MALAT1 sequence (8775 basis) is strongly interacting with EZH2 (global score of 0.95 over 1.00) in full agreement with experiments [17]. We used it as positive control for catRAPID results. HBx is found to be interacting with MALAT1 only if the full MALAT1 is considered (0.83 global score). When a portion of ~1100 bases, containing the primers used in our experiments, is investigated with catRAPID, a much lower interaction is found (0.41 over 1.00) corresponding to a non-interacting case (the threshold is global score > 0.5 for interacting systems), in agreement with our experimental findings.

#### (d) Docking predictions

It has been recently proven, with a high-throughput docking experiment, that different complexes have different overall signals in their docking scores [34], and that standard docking algorithms scores are able to distinguish real interactors from non-interacting cases. We therefore used here docking results to establish the existence of protein-RNA interactions and, with some caution, we relied on the score rankings from HEX [19] and HADDOCK [23,24] as relative indicators of the strength of the interaction to evaluate the propensity of proteins to bind DLEU2 intron 1. HEX uses a shape complementarity scoring function, i.e. it performs rigid docking and spatial shape fitting, providing a very efficient configurations sampling. HADDOCK includes the most refined description of the interaction, but, as it requires information on the interaction interface, we used preliminary docking results from HEX to define it. In particular, the HADDOCK docking protocol requires the determination of the list of *active* residues. We assigned them as the protein residues (intron 1 nucleotides) with at least one atom within 5 Å of intron 1 nucleotides (protein residues) in the complexes produced by HEX. These amino acids (bases) are used as putative binding sites at the protein/RNA interface. *Passive* residues, also required by HADDOCK protocol, are defined automatically around the active ones.

By docking of HBx on DLEU2 intron 1 with HEX (by including also the electrostatic contributions in the scoring function, beside the volumetric terms), interestingly we found two loci on the intron 1 with nearly equal probability to be occupied by HBx (see Figure 3a, panels 1-2). Also in the case of the interaction of the PRC2 protein EZH2 with DLEU2 intron 1, HEX calculations provide two loci on the DLEU2 intron 1 with nearly equal probability to be occupied by EZH2 (Figure 3b, panels 1-2). The most stable configurations of HBx (EZH2)-DLEU2 intron 1 complex have been further refined with HADDOCK, confirming the presence of two distinct configurations with very similar scores, corresponding to HBx (EZH2) bound to one or the other loci on RNA already found via HEX.

HEX calculations have been carried out to investigate the ternary EZH2 - DLEU2 intron 1 - HBX complexes, and HADDOCK results confirm the most stable configurations of the proteins - DLEU2 intron 1 triplet complexes (Figure 3c, panels 1-8).

For studying the triplet complexes, we used at first the DLEU2 intron 1 - EZH2 binary complex as reference term. We focus on the two identified loci on DLEU2 intron 1, close to those potentially targeted by HBx, displaying a nearly equal probability to be occupied by EZH2. The most stable ternary complexes obtained are shown in Figure 3c (panels 5-8). HBx can occupy either one or the other of the two most probable EZH2 loci on the DLEU2 intron 1 (see Figure 3c, panels 5 and 8) or even the same locus on DLEU2 intron 1 (see Figure 3c, panels 6 and 7). The opposite mechanism was also investigated, i.e. we used as docking targets for EZH2 the two binary HBx- DLEU2 intron 1 complexes shown in Figure 3a, obtaining the ternary complexes shown in Figure 3c, panels 1-4. Also in this case, we could find configurations in which the two proteins (HBx and EZH2) bind the intron 1 of DLEU2 in the same region (Figure 3c, panels 1 and 4) or in which EZH2 occupies one or the other HBx loci on the DLEU2 intron 1 (Figure 3c, panels 2 and 3). We verified that a similar mechanism holds in the case of exon 6 (unpublished), where HBx and EZH2 share the same preferential binding site. If the exon 6 locus is occupied by one of the two proteins, the other one arranges to bind close by.

Our *in silico* model cannot take into account conformational changes induced by HBx binding on the lncRNA or on the protein structure (even though refined docking methods performs some atomic local relaxation), and therefore we did not investigate the possible effects of HBx on the lncRNA ability to bind other proteins upon structural modifications induced by HBx interaction.

#### **e) Protein-protein and protein-lncRNAs control docking**

We assessed the quality of both our HBx model and our docking protocol by using some experimental information on other HBx complexes and RNA structures.

X-rays data on DDB1-HBx short stretch complex [35] (PDB entry: 3I7H) show that HBx interacts with DDB1 via a short helix structure (residues 88-100). We docked (via HADDOCK) our HBx model and DDB1; the resulting score value is slightly higher (by 5%) than in the HBx- DLEU2 intron 1 case. We verified that i) the interaction is driven by the same short helix (aa 88-100), and ii) the short HBx helix sits at the same DDB1 site, as experimentally observed. Further docking results for our HBx model and protein HBXIP (PDB entry: 3MS6) identify the interface aa 137-140, as proposed in [33].

We also relied on some control dockings performed using other RNAs, looking for a negative control

case, by choosing a small portion of MALAT1, a lncRNA that, according to our experimental data, has no interaction with HBx. In particular, docking HBx to the MALAT1 triple helix (4PLX.pdb), returns an interaction score lower by the 25% with respect to HBx- DLEU2 intron 1. This can be used as negative control for HBx-RNA interactions.

On the other hand, given the strong interaction of HBx and DDB1, one could conceive that DDB1 alone, or even its complex with HBx, would interact with the lncRNA considered in this work. Results from our docking protocols show that neither DDB1 nor the HBX-DDB1 complex significantly interact with the lncRNA, providing a second case of negative control for protein-lncRNA interaction. In other terms, our docking procedure is able to discriminate among real or just supposed protein-RNA interactors.

### **Legends to Supplementary Figures**

**Figure S1. DLEU2 expression in hepatocellular carcinoma (a)** lncRNAs expression from RNA-Seq data [36], tumor and adjacent normal tissues from 60 patients. T= Tumor. ANT= Adjacent Normal Tissues. **(b)** Expression of selected lncRNAs in hepatocellular carcinoma (HCC) (microarray dataset in 81 patients) [37].

**Figure S2. HBx modulates DLEU2 expression in HepG2, NTCP-HepG2 and HepAD38 cell lines.**

**(a)** HBx occupancy and H4 histone acetylation on the promoter region of DLEU2. Crosslinked chromatin from mock, wild-type HBV (HBV wt) or HBV HBx mutant (HBV mt HBx) replicating HepG2 and induced HepAD38 cells was immuno-precipitated with specific anti-HBx, anti-Ach4 antibodies or relevant IgG controls, and then analyzed by real-time qPCR using specific primer pairs. The detection of HBV cccDNA using specific primers in the ChIPed DNA from HBV wt-infected or HBV wt-replicating cells (cccDNA-ChIP) served as a technical positive control for the ChIP procedure. ChIP results are expressed as fold induction (FI) of the % of input with respect to mock. **(b)** Real-time qPCR of DLEU2 mRNA in mock, HBV wt-infected HepG2-NTCP cells (7 days) and HepG2 (48 h) and HepAD38 (48 h) HBV-replicating cells. Results are expressed as values relative to endogenous human GAPDH mRNAs. **(c)** PCR detection (*upper panels*) and relative densitometry analysis (*lower panels*) of exons 2-4 and  $\beta$ -Actin in mock and HBV wt-infected HepG2-NTCP cells (7 days), HepG2 (48 h) and HepAD38 (48 h) HBV-replicating cells. Results are expressed as FI relative to the mock after normalization to endogenous human  $\beta$ -Actin mRNAs. **(d)** PCR detection (*upper panels*) and relative densitometry analysis (*lower panel*) of the DLEU2 exons 2-4, intron 1 and  $\beta$ -Actin in the nuclear fraction (N) of mock and HBV wt-replicating HepG2 cells. Results are expressed as in S2c. **(e)** Real-time qPCR of DLEU2 exons 9-10 (*lower left panel*), PCR detection (*lower right panel*) and the relative densitometry analysis (*upper right panels*) of intron 1 in mock and in the nuclear fraction of HBx-HA transfected HepG2 cells. Results are expressed as in S2c. **(f)** Real-time qPCR of DLEU1 mRNA in mock and HBV wt-replicating HepG2 cells. Results are expressed as in S2b. In panels (a) to (f) \* = p-value < 0.05; Mann-Whitney test.



**Figure S3. HBx binding to DLEU2.** (a) Lysates from HBV wt-replicating HepG2 cells were subjected to RIP using IgG control or anti-HBx antibody. DLEU2 exons 2-4, intron 1,  $\beta$ -Actin and MALAT1 were detected by PCR and analyzed by relative densitometry. (b) Detection of HBx recombinant protein (17 kDa) by Western blot with the anti-HBx antibody (ThermoFisher antibody Cat#MA1-081). The 10 kDa faster migrating band represents a degradation product of the recombinant protein. (c) Immunoprecipitation (IP) of HBx with the anti-HBx antibody from ThermoFisher (Cat#MA1-081) and detection by immunoblotting using the same anti-HBx antibody in HBV wt-replicating HepG2 cells (*right*) and by the anti-HBx from Abcam (cat#Ab39716) in HBV-infected HepG2-NTCP cells (*left*). (d) Immunoblot analysis of RNA pull-down eluates showing the interaction between DLEU2 RNA (100 pmol) and HBx (0.5  $\mu$ g). In (a) \* = p-value < 0.05, Mann-Whitney test

**Figure S4. Modeling HBx protein.** (a) HBx 3D structure, with color highlighted secondary structure. Coil regions (mainly in the first half of the protein sequence) are in white and cyan, alpha helices in violet, beta-sheets in yellow. The homology modeling within I-TASSER has been performed by using default parameter values. Constraints on four disulfide bonds [30] among pairs of cysteines (C7-C69, C17-C143, C61-C115, C78 -C137) have been used. The 3D structure is different from a previous model not including constraints on cysteines [31]. Residues predicted to interact with RNA, according to RNABindRPlus, are explicitly shown, colored in orange (interacting score  $P > 0.9$  over a maximum score of 1.0), green (interacting score  $0.9 > P > 0.7$ ) and blue (interacting score  $0.7 > P > 0.5$ ). Our 3D model is in good agreement with both the (b) IUPRED results that predict the most disordered regions in the initial part of the sequence, and the (c) DISOPRED results on the secondary structure.

**Figure S5. DLEU2 RNA secondary structure.** Secondary structure of DLEU2 intron 1 portion (439 nucleotides) is predicted with DotKnot and plotted with Pseudowiever. Pseudoknots are highlighted in bright yellow. Parts interacting with HBx (as obtained from docked HBx-DLEU2 intron 1 complex)

are highlighted, in particular the two adsorption loci on DLEU2 intron 1 are identified as light red and bright red zones.

**Figure S6. DLEU2 depletion by specific locked nucleic acid (LNA) longRNA Gappers in HBV-replicating hepatic cell lines.** (a) Real-time PCR of DLEU2 RNA levels in mock and HBV-infected PHH (4 days) (*left panel*) or HBV wt-replicating HepG2 cells (*middle panel*) or NTCP-HepG2 cells (4 days) (*right panel*) in the presence of scrambled Gappers (CTL) or DLEU2 Gappers pools. Results are expressed as fold induction (FI) relative to the mock after normalization to endogenous human GAPDH mRNAs. (b) Real time PCR of HBV pgRNA levels in HBV wt-replicating HepG2 cells (48h) and in HBV-infected HepG2-NTCP cells (4 days) in the presence of scrambled Gapmer (CTL) or DLEU2-specific Gapmer pools. Results are expressed as in S6a. Data in panels (a) and (b) represent means  $\pm$  SD from at least three independent experiments performed in duplicate. In (a-b) \* = p-value < 0.05, Mann-Whitney test

**Figure S7.** (a) TRIM13, CCNB2, DNMT1, PRC1, POLE2 and ZBTB34 mRNA levels (transcriptomic data from the TCGA-LIHC, dataset) in non tumor (NT) and in tumor liver tissues (T) from 371 HCC patients. (b) HCC patients survival according to TRIM13, CCNB2, DNMT1, PRC1, POLE2 and ZBTB34 expression levels. Kaplan-Meier curves and survival fits were computed via the R2 web portal (<http://r2.amc.nl>) by setting the highest survival censorship to 60 months and partitioning the dataset by each RNA median value.

**Figure S8. DLEU2 and HBx cooperate in the transcriptional regulation of the TRIM13 host gene.** (a) Real time PCR of TRIM13 mRNA in mock, HBV-infected HepG2-NTCP cells (7 days); HBV wt-replicating HepG2 cells (48 h) and non-induced (Tet+) or induced (Tet-) HepAD38 cells (48 h). Results are expressed as values relative to endogenous human GAPDH mRNAs. (b) H4 acetylation at the TRIM13 promoter region. Cross-linked chromatin from mock, HBV wt- or HBV mt HBx-transfected HepG2 cells and induced HepAD38 cells (48 h) was immunoprecipitated with an anti-Ach4 antibody or relevant control IgG and then analyzed by real-time qPCR using specific

primer pairs. ChIP results are expressed as fold induction (FI) of the % of input with respect to mock and analyzed as in Figure 4c. **(c)** Real Time PCR of TRIM13 mRNA in HBV wt-infected HepG2-NTCP cells (4 days) in the presence or absence of scrambled Gapmer (CTL) and DLEU2 Gapmers. Results are expressed as values relative to endogenous human GAPDH mRNAs. **(d)** Real time PCR of TRIM13 mRNA in mock, HBV wt or HBV mt HBx transfected HepG2 cells (48 h) in the presence or absence of scrambled Gapmers (CTL) and DLEU2 Gapmers. Results are expressed as fold induction (FI) relative to the mock after normalization to endogenous human GAPDH mRNAs. **(e)** H4 acetylation at the TRIM13 promoter in HBV-replicating HepG2 cells (HBV) transfected with scrambled Gapmers (CTL) or DLEU2 Gapmers. ChIP results are expressed as fold induction (FI) of the % of input relative to mock. **(f)** EZH2 occupancy (left) and H3meK27 mark (*right*) on TRIM13 promoter by ChIP assay in HBV wt or HBV mt HBx-replicating HepG2 cells (48 h). ChIP results are expressed as % of input and as FI of the % of input with respect to mock. Data in panels (a) to (f) represent means  $\pm$  SD from at least three independent experiments performed in duplicate. In (a) to (f) \* = p-value < 0.05; Mann-Whitney test.

**Figure S9. EZH2 and SUZ12 protein levels in HBV infected cells.** Western blot analysis (*left*) with the indicated antibodies and relative densitometry analysis (*right*) of total protein extracts from **(a)** HBV-infected PHHs (7 days) and from **(b)** HBV-infected HepG2-NTCP (7 days). Histograms in panels (a) and (b) represent means  $\pm$  SD from at least three independent experiments.

Figure S1

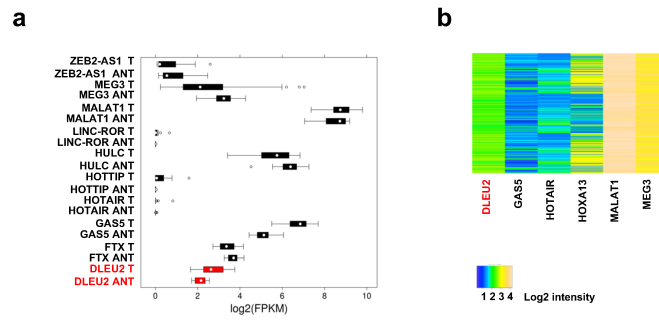

Figure S2

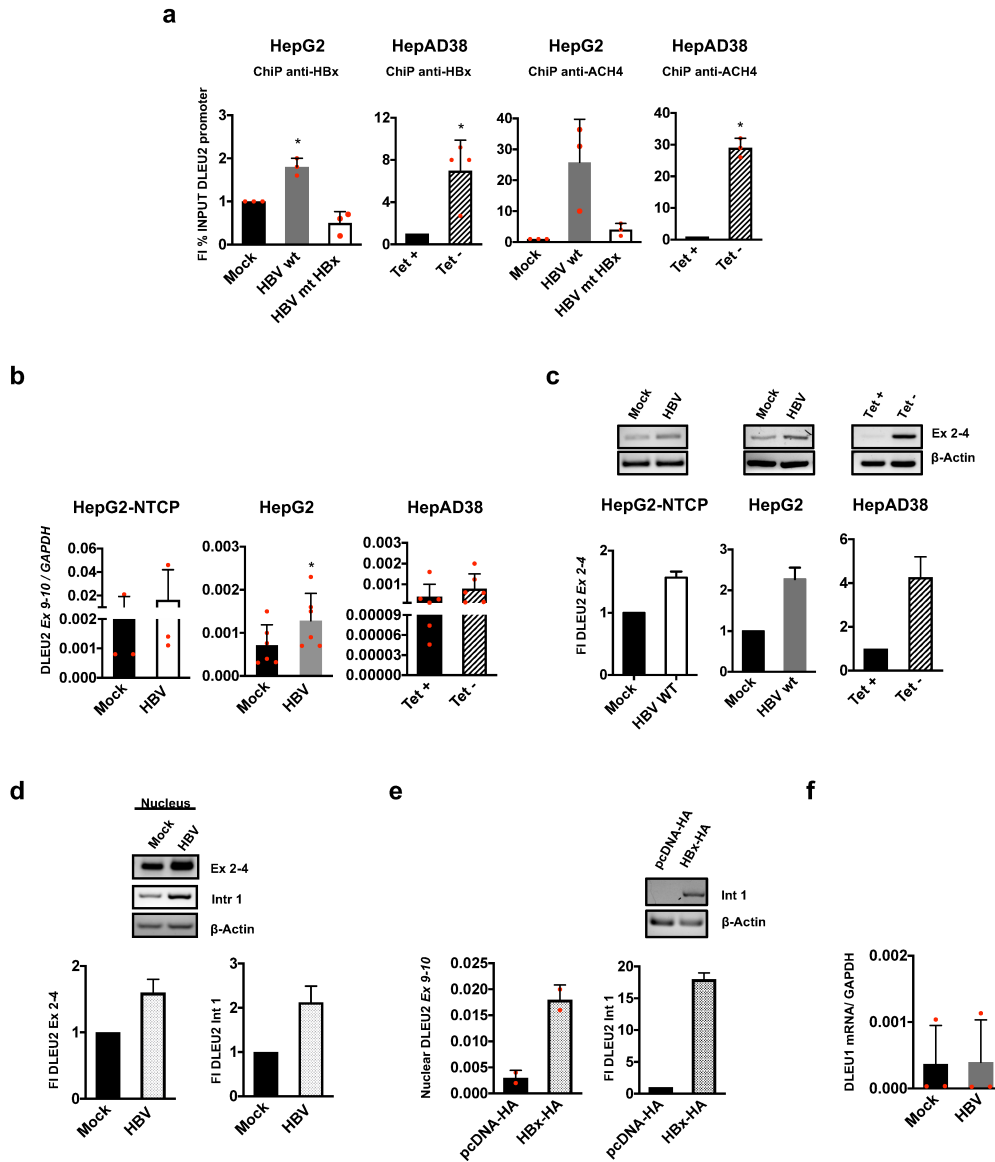

Figure S3

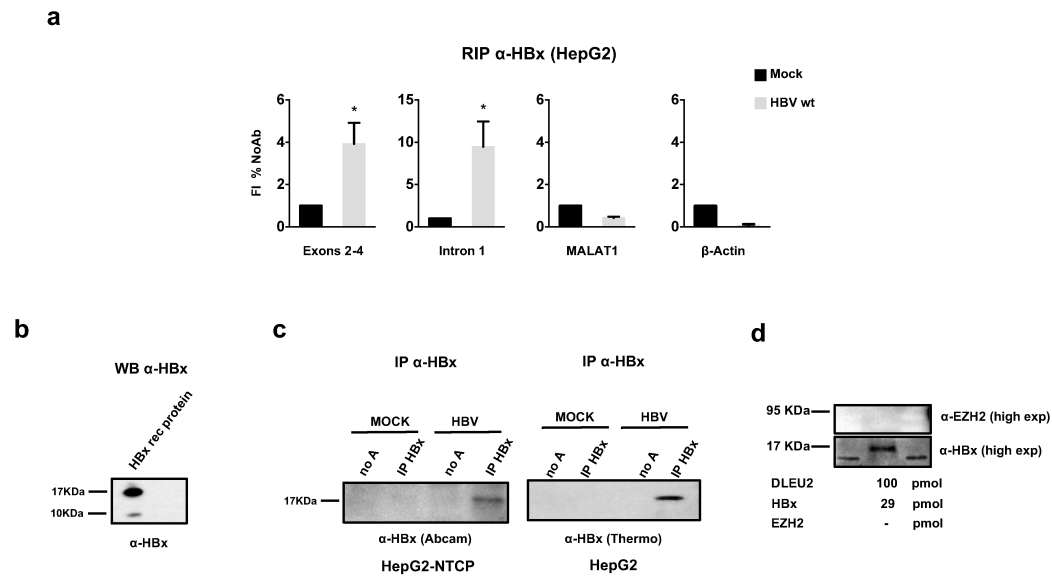

Figure S4

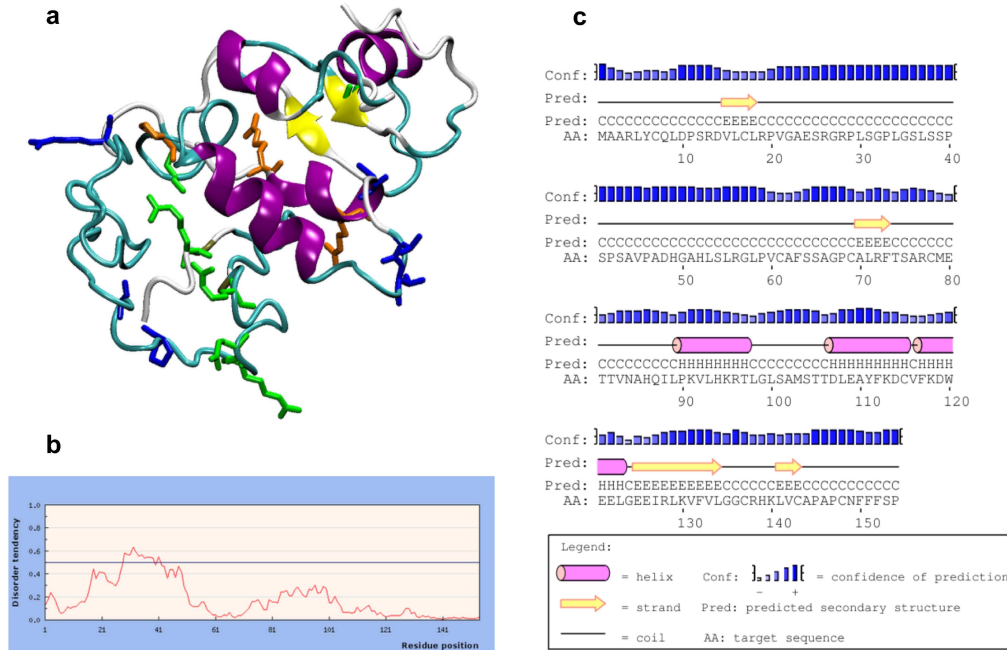

**Figure S5**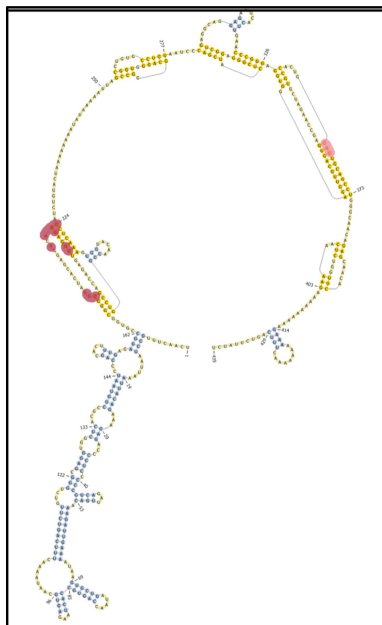



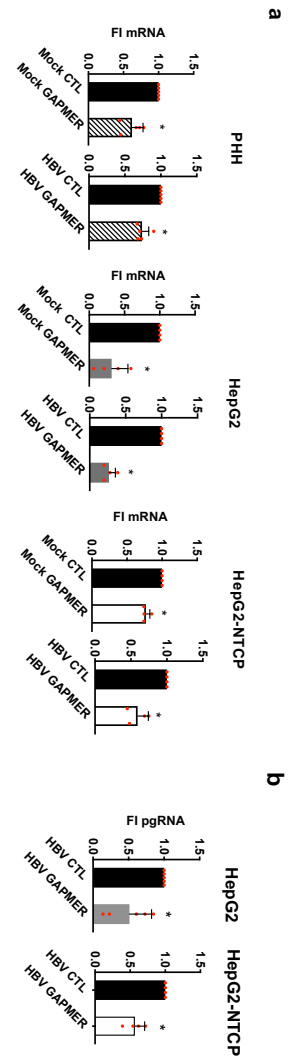

Figure S7

a

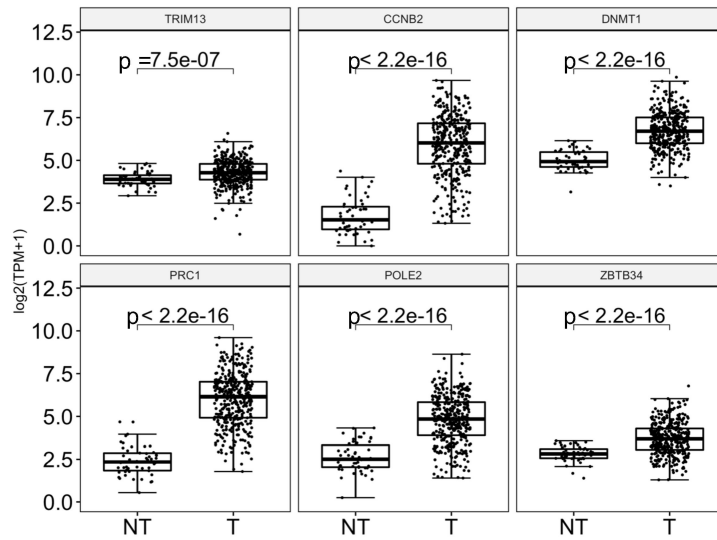

b

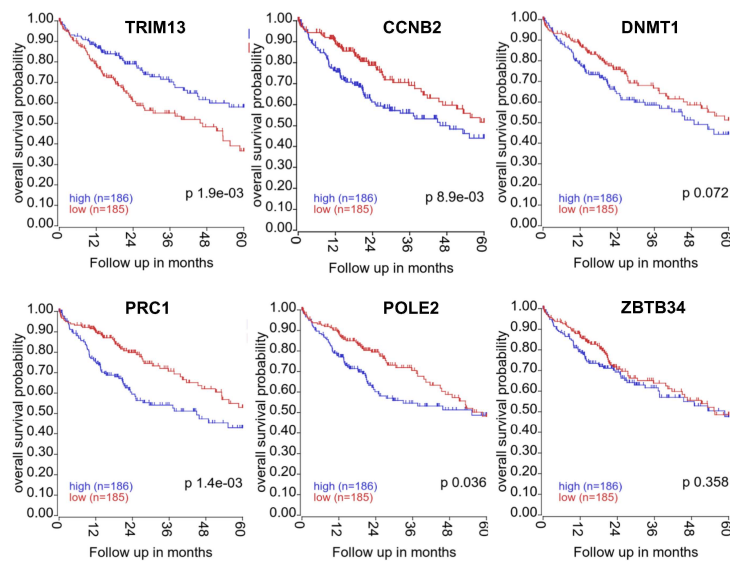

Figure S8

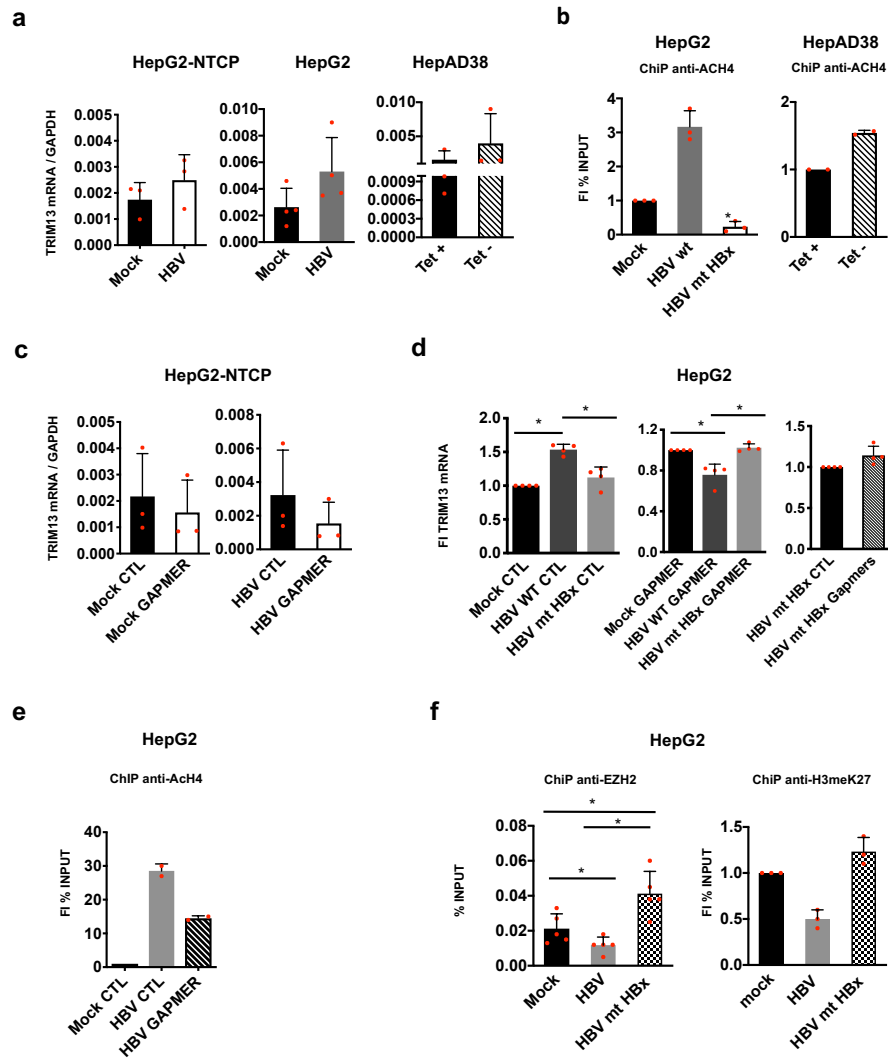

Figure S9

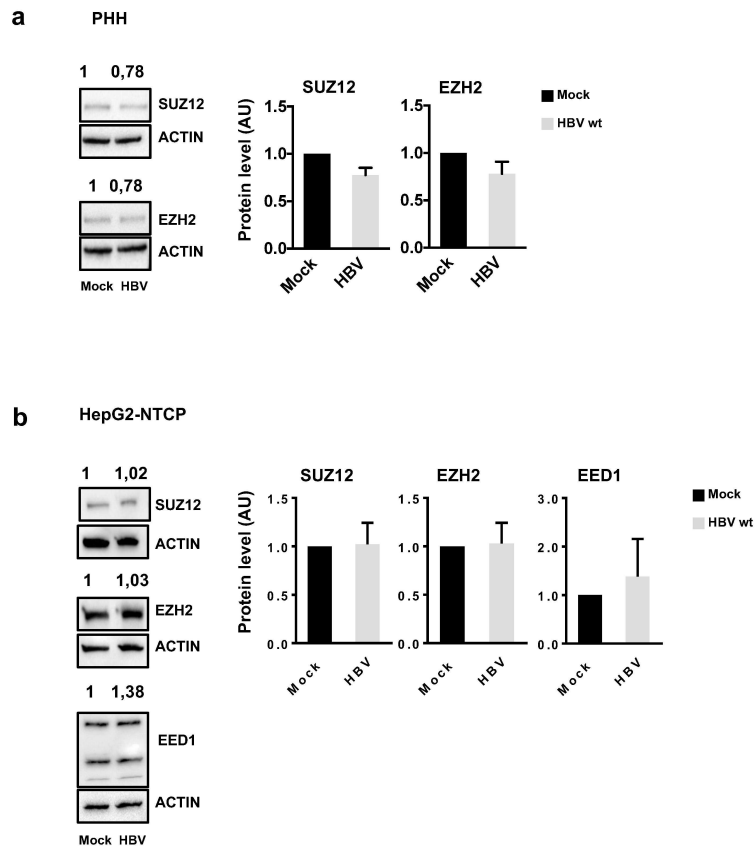

Table S1

| <b>LncRNA</b>  | <b>HBx peak position</b> |
|----------------|--------------------------|
| 1. C1orf126    | Promoter                 |
| 2. CASC2       | Promoter                 |
| 3. LINC00271   | Promoter/ In Gene        |
| 4. LINC00277   | Promoter                 |
| 5. LINC00299   | Promoter/ In Gene        |
| 6. LINC00441   | Promoter                 |
| 7. LINC00478   | Promoter/ In Gene        |
| 8. LINC00486   | Promoter/ In Gene        |
| 9. LINC00487   | Promoter                 |
| 10. LINC00521  | Promoter                 |
| 11. LINC00526  | Promoter/ In Gene        |
| 12. MIR4500HG  | Promoter                 |
| 13. PLK1S1     | Promoter/ In Gene        |
| 14. RBM26-AS1  | Promoter                 |
| 15. DLEU2      | Promoter/ In Gene        |
| 16. CHODL-AS1  | In Gene                  |
| 17. HCG18      | In Gene                  |
| 18. LINC00303  | In Gene                  |
| 19. LINC00305  | In Gene                  |
| 20. LINC00330  | In Gene                  |
| 21. LINC00340  | In Gene                  |
| 22. LINC00467  | In Gene                  |
| 23. LINC00473  | In Gene                  |
| 24. LINC00476  | In Gene                  |
| 25. LINC00511  | In Gene                  |
| 26. LINC00535  | In Gene                  |
| 27. LINC00536  | In Gene                  |
| 28. MIR210HG   | In Gene                  |
| 29. MIR31HG    | In Gene                  |
| 30. PVT1       | In Gene                  |
| 31. SKINTL     | In Gene                  |
| 32. SNHG12     | In Gene                  |
| 33. SOX2-OT    | In Gene                  |
| 34. TMEM72-AS1 | In Gene                  |

Table S2

| Probeset        | HUGO      | R.value | R.pvalue     | Hbx peak |
|-----------------|-----------|---------|--------------|----------|
| ABCC10_89845    | ABCC10    | 0.455   | 0.0012271767 |          |
| ABHD3_171586    | ABHD3     | 0.408   | 0.0068224833 |          |
| ACIN1_22985     | ACIN1     | 0.45    | 0.0015427303 | promoter |
| ACVR2B_93       | ACVR2B    | 0.418   | 0.0049164901 |          |
| AFP_174         | AFP       | 0.502   | 0.0001550709 |          |
| AGBL2_79841     | AGBL2     | 0.436   | 0.0026407528 |          |
| ALS2_57679      | ALS2      | 0.4     | 0.0089852837 | in gene  |
| ANGEL1_23357    | ANGEL1    | 0.401   | 0.0086182898 |          |
| ANKAR_150709    | ANKAR     | 0.422   | 0.0043772188 | in gene  |
| ANKRD13A_88455  | ANKRD13A  | 0.474   | 0.0005596312 | in gene  |
| ANKRD36_375248  | ANKRD36   | 0.397   | 0.009773233  |          |
| ARHGEF1_9138    | ARHGEF1   | 0.429   | 0.0034266939 | in gene  |
| ARID3A_1820     | ARID3A    | 0.479   | 0.0004490759 |          |
| ARID3B_10620    | ARID3B    | 0.486   | 0.0003308236 | in gene  |
| ARL6IP6_151188  | ARL6IP6   | 0.417   | 0.0051661087 |          |
| BLM_641         | BLM       | 0.512   | 9.46E+09     |          |
| BRD1_23774      | BRD1      | 0.407   | 0.0071231974 |          |
| C12orf76_400073 | C12orf76  | 0.587   | 1,12E+08     | in gene  |
| C13orf23_80209  | PROSER1   | 0.543   | 1,71E+09     |          |
| C13orf34_79866  | BORA      | 0.534   | 2,91E+08     |          |
| C14orf101_54916 | TMEM260   | 0.546   | 1,46E+09     |          |
| C14orf139_79686 | LINC00341 | 0.397   | 0.0097835723 |          |
| C15orf23_90417  | KNSTRN    | 0.422   | 0.0042686153 |          |
| C15orf29_79768  | KATNBL1   | 0.439   | 0.0023084816 |          |
| C15orf42_90381  | TICRR     | 0.457   | 0.0011670061 |          |
| C15orf56_644809 | C15orf56  | 0.428   | 0.0034501421 |          |
| C21orf45_54069  | MIS18A    | 0.501   | 0.0001608295 |          |
| C22orf39_128977 | C22orf39  | 0.524   | 5,03E+09     | in gene  |

|                        |             |       |              |          |
|------------------------|-------------|-------|--------------|----------|
| <b>C2orf15_150590</b>  | C2orf15     | 0.533 | 3,02E+09     | promoter |
| <b>C2orf54_79919</b>   | C2orf54     | 0.41  | 0.0065608719 |          |
| <b>C2orf60_129450</b>  | TYW5        | 0.484 | 0.0003656675 |          |
| <b>C5orf13_9315</b>    | NREP        | 0.453 | 0.0013541265 |          |
| <b>C5orf34_375444</b>  | C5orf34     | 0.424 | 0.0040856975 |          |
| <b>C6orf146_222826</b> | FAM217A     | 0.402 | 0.0083679336 |          |
| <b>C8ORFK29_340393</b> | TMEM249     | 0.422 | 0.0042791582 |          |
| <b>C9orf45_81571</b>   | MIR600HG    | 0.443 | 0.0019990112 |          |
| <b>CASP3_836</b>       | CASP3       | 0.473 | 0.0005892718 |          |
| <b>CBFA2T2_9139</b>    | CBFA2T2     | 0.463 | 0.0009167023 | promoter |
| <b>CCDC150_284992</b>  | CCDC150     | 0.528 | 3,95E+09     |          |
| <b>CCNB2_9133</b>      | CCNB2       | 0.408 | 0.0070015017 | promoter |
| <b>CCNL1_57018</b>     | CCNL1       | 0.417 | 0.0050950341 | promoter |
| <b>CCNYL1_151195</b>   | CCNYL1      | 0.486 | 0.0003343846 |          |
| <b>CDC42BPG_55561</b>  | CDC42BPG    | 0.442 | 0.0020909356 | in gene  |
| <b>CDCA4_55038</b>     | CDCA4       | 0.424 | 0.0039743006 |          |
| <b>CG030_116828</b>    | N4BP2L2-IT2 | 0.454 | 0.0012994755 |          |
| <b>CHEK2_11200</b>     | CHEK2       | 0.451 | 0.0014816451 |          |
| <b>CHST13_166012</b>   | CHST13      | 0.432 | 0.0030254254 |          |
| <b>CKAP2_26586</b>     | CKAP2       | 0.406 | 0.0073251417 |          |
| <b>CLDN1_9076</b>      | CLDN1       | 0.475 | 0.0005415688 | in gene  |
| <b>CMYA5_202333</b>    | CMYA5       | 0.437 | 0.0025517349 | in gene  |
| <b>COMMD2_51122</b>    | COMMD2      | 0.464 | 0.0008766404 |          |
| <b>CPSF7_79869</b>     | CPSF7       | 0.446 | 0.0017876323 |          |
| <b>CREB1_1385</b>      | CREB1       | 0.409 | 0.0066069983 | in gene  |
| <b>CROT_54677</b>      | CROT        | 0.47  | 0.0006676271 |          |
| <b>CSNK1G1_53944</b>   | CSNK1G1     | 0.417 | 0.0051250316 | in gene  |
| <b>CTDSPL2_51496</b>   | CTDSPL2     | 0.41  | 0.0064647978 |          |
| <b>CYP20A1_57404</b>   | CYP20A1     | 0.434 | 0.002799887  | in gene  |
| <b>CYP4F22_126410</b>  | CYP4F22     | 0.437 | 0.0025133981 | promoter |
| <b>DBF4_10926</b>      | DBF4        | 0.455 | 0.001241255  |          |

|                          |          |       |              |          |
|--------------------------|----------|-------|--------------|----------|
| <b>DDX12_440081</b>      | DDX12P   | 0.448 | 0.0016463493 |          |
| <b>DGCR8_54487</b>       | DGCR8    | 0.401 | 0.0086304395 |          |
| <b>DICER1_23405</b>      | DICER1   | 0.464 | 0.0008566198 |          |
| <b>DIP2A_23181</b>       | DIP2A    | 0.423 | 0.004122365  | in gene  |
| <b>DLEU2_8847</b>        | DLEU2    | 1     | 0            |          |
| <b>DNA2_1763</b>         | DNA2     | 0.425 | 0.0038439883 |          |
| <b>DNAH8_1769</b>        | DNAH8    | 0.465 | 0.0008440995 | in gene  |
| <b>DNAI1_27019</b>       | DNAI1    | 0.4   | 0.0088225478 |          |
| <b>DNAJC9_23234</b>      | DNAJC9   | 0.429 | 0.0033236753 |          |
| <b>DNM1P35_100128285</b> | DNM1P35  | 0.398 | 0.0093192565 |          |
| <b>DNMT1_1786</b>        | DNMT1    | 0.396 | 0.0098359714 | promoter |
| <b>DNMT3B_1789</b>       | DNMT3B   | 0.459 | 0.0010458062 |          |
| <b>DOPEY1_23033</b>      | DOPEY1   | 0.441 | 0.0021524537 | promoter |
| <b>DOT1L_84444</b>       | DOT1L    | 0.403 | 0.0080884726 | in gene  |
| <b>DQX1_165545</b>       | DQX1     | 0.425 | 0.0039067797 |          |
| <b>DSCAML1_57453</b>     | DSCAML1  | 0.403 | 0.0081457314 | in gene  |
| <b>ELF1_1997</b>         | ELF1     | 0.447 | 0.001712932  | in gene  |
| <b>ENPP5_59084</b>       | ENPP5    | 0.397 | 0.009763942  |          |
| <b>ERCC6_2074</b>        | ERCC6    | 0.464 | 0.0008779451 |          |
| <b>ESCO1_114799</b>      | ESCO1    | 0.397 | 0.0097832822 |          |
| <b>EXOSC8_11340</b>      | EXOSC8   | 0.448 | 0.0016683451 | in gene  |
| <b>FAM118A_55007</b>     | FAM118A  | 0.404 | 0.0077435074 |          |
| <b>FAM119A_151194</b>    | METTL21A | 0.478 | 0.0004748156 | in gene  |
| <b>FAM48A_55578</b>      | SUPT20H  | 0.506 | 0.0001283992 |          |
| <b>FANCD2_2177</b>       | FANCD2   | 0.441 | 0.002141698  |          |
| <b>FBXO11_80204</b>      | FBXO11   | 0.432 | 0.0029851349 |          |
| <b>FBXO5_26271</b>       | FBXO5    | 0.412 | 0.006109282  |          |
| <b>FER1L5_90342</b>      | FER1L5   | 0.47  | 0.0006916937 |          |
| <b>FNBP4_23360</b>       | FNBP4    | 0.466 | 0.0008028974 |          |
| <b>FZD5_7855</b>         | FZD5     | 0.445 | 0.0018925188 |          |
| <b>GALNT3_2591</b>       | GALNT3   | 0.462 | 0.0009519416 |          |



|                        |           |       |              |          |
|------------------------|-----------|-------|--------------|----------|
| <b>GCFC1_94104</b>     | PAXBP1    | 0.483 | 0.0003808331 |          |
| <b>GEN1_348654</b>     | gen-01    | 0.455 | 0.0012543617 |          |
| <b>GJB6_10804</b>      | GJB6      | 0.442 | 0.0020489573 | promoter |
| <b>GLDC_2731</b>       | GLDC      | 0.396 | 0.0099818199 | promoter |
| <b>GOLGA6L5_374650</b> | GOLGA6L5P | 0.416 | 0.0053922015 |          |
| <b>GOLGA6L9_440295</b> | GOLGA6L9  | 0.408 | 0.0068256581 |          |
| <b>GPC5_2262</b>       | GPC5      | 0.516 | 7,57E+09     | in gene  |
| <b>GPR137C_283554</b>  | GPR137C   | 0.446 | 0.0018081281 |          |
| <b>GPR143_4935</b>     | GPR143    | 0.399 | 0.0092774872 | in gene  |
| <b>GPRC5D_55507</b>    | GPRC5D    | 0.407 | 0.0070697978 |          |
| <b>GRHL1_29841</b>     | GRHL1     | 0.414 | 0.0056943325 | promoter |
| <b>GTSE1_51512</b>     | GTSE1     | 0.411 | 0.0062364712 |          |
| <b>H19_283120</b>      | H19       | 0.398 | 0.0093272043 |          |
| <b>HAUS2_55142</b>     | HAUS2     | 0.442 | 0.002066981  |          |
| <b>HELLS_3070</b>      | HELLS     | 0.431 | 0.0031836956 |          |
| <b>HIC2_23119</b>      | HIC2      | 0.559 | 6,48E+08     |          |
| <b>HNRNPA3P1_10151</b> | HNRNPA3P1 | 0.445 | 0.0018950979 |          |
| <b>HNRNPA3_220988</b>  | HNRNPA3   | 0.511 | 9,74E+08     |          |
| <b>IGSF1_3547</b>      | IGSF1     | 0.468 | 0.0007487614 |          |
| <b>IL1RAP_3556</b>     | IL1RAP    | 0.463 | 0.0009106159 | in gene  |
| <b>ILF3_3609</b>       | ILF3      | 0.463 | 0.0009139349 |          |
| <b>INTS4_92105</b>     | INTS4     | 0.398 | 0.0094034768 |          |
| <b>INTS6_26512</b>     | INTS6     | 0.419 | 0.0048687667 |          |
| <b>JUB_84962</b>       | AJUBA     | 0.414 | 0.0056923278 |          |
| <b>KBTBD6_89890</b>    | KBTBD6    | 0.465 | 0.0008257055 |          |
| <b>KCNJ3_3760</b>      | KCNJ3     | 0.443 | 0.0019946214 | in gene  |
| <b>KIAA0528_9847</b>   | C2CD5     | 0.399 | 0.0090697882 |          |
| <b>KIAA1704_55425</b>  | GPALPP1   | 0.466 | 0.0008012055 |          |
| <b>KIF20B_9585</b>     | KIF20B    | 0.423 | 0.0041784896 |          |
| <b>KIF6_221458</b>     | KIF6      | 0.489 | 0.000282736  | in gene  |
| <b>KIFC1_3833</b>      | KIFC1     | 0.411 | 0.006258148  |          |

|                          |           |       |              |          |
|--------------------------|-----------|-------|--------------|----------|
| <b>KLRAQ1_129285</b>     | PPP1R21   | 0.536 | 2,51E+09     |          |
| <b>LCTL_197021</b>       | LCTL      | 0.409 | 0.0066503591 |          |
| <b>LGR4_55366</b>        | LGR4      | 0.397 | 0.0095742902 | in gene  |
| <b>LIG1_3978</b>         | LIG1      | 0.443 | 0.0019760096 | in gene  |
| <b>LMNB1_4001</b>        | LMNB1     | 0.401 | 0.0086278164 | in gene  |
| <b>LOC284100_284100</b>  | YWHAEP7   | 0.415 | 0.0055508857 |          |
| <b>LOC641367_641367</b>  | LOC641367 | 0.421 | 0.004433561  |          |
| <b>LOC642846_642846</b>  | LOC642846 | 0.418 | 0.0049021408 |          |
| <b>LOC647121_647121</b>  | EMBP1     | 0.49  | 0.0002685365 |          |
| <b>LRRC66_339977</b>     | LRRC66    | 0.422 | 0.0043779091 |          |
| <b>LSR_51599</b>         | LSR       | 0.443 | 0.0020398516 | promoter |
| <b>MAL2_114569</b>       | MAL2      | 0.441 | 0.0022045714 |          |
| <b>MAPK6_5597</b>        | MAPK6     | 0.398 | 0.0094050714 |          |
| <b>MBTD1_54799</b>       | MBTD1     | 0.441 | 0.0021892319 |          |
| <b>MCCD1_401250</b>      | MCCD1     | 0.402 | 0.0083286665 |          |
| <b>MED4_29079</b>        | MED4      | 0.481 | 0.000407935  |          |
| <b>MEP1A_4224</b>        | MEP1A     | 0.47  | 0.0006672635 |          |
| <b>MEST_4232</b>         | MEST      | 0.517 | 7,20E+09     | promoter |
| <b>MIR17HG_407975</b>    | MIR17HG   | 0.424 | 0.0040664072 |          |
| <b>MITD1_129531</b>      | MITD1     | 0.433 | 0.0029103399 | promoter |
| <b>MOSC1_64757</b>       | MOSC1     | 0.428 | 0.0034476678 |          |
| <b>MTRF1_9617</b>        | MTRF1     | 0.534 | 2,77E+08     | In gene  |
| <b>MXD1_4084</b>         | MXD1      | 0.429 | 0.0034303004 |          |
| <b>MYO5C_55930</b>       | MYO5C     | 0.433 | 0.0029686082 |          |
| <b>NAA16_79612</b>       | NAA16     | 0.646 | 1,45E+06     | In gene  |
| <b>NAALAD2_10003</b>     | NAALAD2   | 0.397 | 0.0096692249 | In gene  |
| <b>NAALADL1_10004</b>    | NAALADL1  | 0.399 | 0.0091477041 |          |
| <b>NARG2_79664</b>       | ICE2      | 0.426 | 0.0037588748 |          |
| <b>NCAPD2_9918</b>       | NCAPD2    | 0.4   | 0.008974431  | in gene  |
| <b>NCRNA00183_554203</b> | JPX       | 0.5   | 0.0001683939 |          |
| <b>NEK8_284086</b>       | NEK8      | 0.423 | 0.0041994108 |          |

|                       |         |       |              |          |
|-----------------------|---------|-------|--------------|----------|
| <b>NFYA_4800</b>      | NFYA    | 0.406 | 0.0074596907 |          |
| <b>NKTR_4820</b>      | NKTR    | 0.431 | 0.0031921644 |          |
| <b>NUDT15_55270</b>   | NUDT15  | 0.568 | 3,93E-03     |          |
| <b>NUSAP1_51203</b>   | NUSAP1  | 0.406 | 0.0073554139 |          |
| <b>OVGP1_5016</b>     | OVGP1   | 0.46  | 0.0010207866 |          |
| <b>PAN3_255967</b>    | PAN3    | 0.417 | 0.005090931  |          |
| <b>PAQR9_344838</b>   | PAQR9   | 0.431 | 0.0030979177 |          |
| <b>PASK_23178</b>     | PASK    | 0.566 | 4,31E-03     |          |
| <b>PBX2_5089</b>      | PBX2    | 0.404 | 0.0078179648 | in gene  |
| <b>PDCD7_10081</b>    | PDCD7   | 0.446 | 0.0017903705 |          |
| <b>PEG10_23089</b>    | PEG10   | 0.431 | 0.0031957443 |          |
| <b>PHIP_55023</b>     | PHIP    | 0.411 | 0.0063480032 |          |
| <b>PI4KAP1_728233</b> | PI4KAP1 | 0.44  | 0.0022841645 |          |
| <b>PIF1_80119</b>     | PIF1    | 0.416 | 0.0052630723 |          |
| <b>PIK3R2_5296</b>    | PIK3R2  | 0.514 | 8,11E+09     | promoter |
| <b>PLAGL2_5326</b>    | PLAGL2  | 0.474 | 0.0005800511 |          |
| <b>PM20D2_135293</b>  | PM20D2  | 0.42  | 0.0046127674 |          |
| <b>POLE2_5427</b>     | POLE2   | 0.497 | 0.0001992556 | promoter |
| <b>POLQ_10721</b>     | POLQ    | 0.445 | 0.0018604781 |          |
| <b>PRC1_9055</b>      | PRC1    | 0.415 | 0.0055869022 | promoter |
| <b>PRDM4_11108</b>    | PRDM4   | 0.403 | 0.0081383553 |          |
| <b>PRKCI_5584</b>     | PRKCI   | 0.415 | 0.0055049625 |          |
| <b>PRKRA_8575</b>     | PRKRA   | 0.397 | 0.0095865302 |          |
| <b>PROM2_150696</b>   | PROM2   | 0.396 | 0.0098476661 |          |
| <b>PRPF39_55015</b>   | PRPF39  | 0.446 | 0.0018157957 | promoter |
| <b>PSPH_5723</b>      | PSPH    | 0.427 | 0.0036385118 | in gene  |
| <b>RAPH1_65059</b>    | RAPH1   | 0.497 | 0.0001990583 | in gene  |
| <b>RAPSN_5913</b>     | RAPSN   | 0.41  | 0.0064447137 |          |
| <b>RARS2_57038</b>    | RARS2   | 0.472 | 0.0006181429 |          |
| <b>RBM9_23543</b>     | RBFOX2  | 0.401 | 0.0086841314 | in gene  |
| <b>REP15_387849</b>   | REP15   | 0.438 | 0.0023784206 | promoter |

|                        |          |       |              |          |
|------------------------|----------|-------|--------------|----------|
| <b>RFXAP_5994</b>      | RFXAP    | 0.424 | 0.0039702655 | in gene  |
| <b>RGL3_57139</b>      | RGL3     | 0.445 | 0.0018595519 |          |
| <b>RNF138_51444</b>    | RNF138   | 0.472 | 0.0006202891 |          |
| <b>RNF219_79596</b>    | RNF219   | 0.487 | 0.0003157979 | promoter |
| <b>RNF39_80352</b>     | RNF39    | 0.458 | 0.0010932958 |          |
| <b>RPIA_22934</b>      | RPIA     | 0.424 | 0.004068626  |          |
| <b>RTKN_6242</b>       | RTKN     | 0.462 | 0.0009390725 | in gene  |
| <b>RTTN_25914</b>      | RTTN     | 0.401 | 0.0086935479 |          |
| <b>SCARNA12_677777</b> | SCARNA12 | 0.408 | 0.0068274723 | promoter |
| <b>SEPT7P2_641977</b>  | SEPT7P2  | 0.468 | 0.0007333111 |          |
| <b>SERPINA5_5104</b>   | SERPINA5 | 0.404 | 0.0078947955 | promoter |
| <b>SETDB2_83852</b>    | SETDB2   | 0.436 | 0.0026476466 | in gene  |
| <b>SFI1_9814</b>       | SFI1     | 0.499 | 0.0001764059 | promoter |
| <b>SFRS18_25957</b>    | PNISR    | 0.4   | 0.0088325713 |          |
| <b>SFRS8_6433</b>      | SFSWAP   | 0.4   | 0.0089654211 | promoter |
| <b>SKA3_221150</b>     | SKA3     | 0.42  | 0.0046566904 |          |
| <b>SLC12A9_56996</b>   | SLC12A9  | 0.426 | 0.0037821212 |          |
| <b>SLC13A2_9058</b>    | SLC13A2  | 0.438 | 0.0023811158 |          |
| <b>SLCO4C1_353189</b>  | SLCO4C1  | 0.467 | 0.0007569245 | in gene  |
| <b>SMARCA1_6594</b>    | SMARCA1  | 0.464 | 0.0008577814 |          |
| <b>SMC4_10051</b>      | SMC4     | 0.494 | 0.0002277301 |          |
| <b>SMPD4_55627</b>     | SMPD4    | 0.397 | 0.0095823554 |          |
| <b>SNHG1_23642</b>     | SNHG1    | 0.406 | 0.0074668787 |          |
| <b>SPATS2L_26010</b>   | SPATS2L  | 0.567 | 4,03E+08     | promoter |
| <b>SPOPL_339745</b>    | SPOPL    | 0.397 | 0.0097024923 |          |
| <b>STRBP_55342</b>     | STRBP    | 0.411 | 0.0063695564 |          |
| <b>STX16_8675</b>      | STX16    | 0.453 | 0.0013624245 |          |
| <b>SUGT1L1_283507</b>  | SUGT1P3  | 0.496 | 0.0002081501 |          |
| <b>SUV39H2_79723</b>   | SUV39H2  | 0.414 | 0.0057901786 |          |
| <b>SVIP_258010</b>     | SVIP     | 0.458 | 0.0011089868 |          |
| <b>TDG_6996</b>        | TDG      | 0.419 | 0.0048025396 | in gene  |

|                           |          |       |              |          |
|---------------------------|----------|-------|--------------|----------|
| <b>TET1_80312</b>         | TET1     | 0.52  | 6,15E+09     |          |
| <b>TIA1_7072</b>          | TIA1     | 0.467 | 0.0007739849 | in gene  |
| <b>TLK1_9874</b>          | TLK1     | 0.497 | 0.0001929891 | promoter |
| <b>TMEM194B_100131211</b> | TMEM194B | 0.428 | 0.0034664565 |          |
| <b>TSGA10_80705</b>       | TSGA10   | 0.525 | 4,75E-02     | promoter |
| <b>TTC21B_79809</b>       | TTC21B   | 0.458 | 0.0011145171 | in gene  |
| <b>TTC3_7267</b>          | TTC3     | 0.414 | 0.0056417702 | promoter |
| <b>TTK_7272</b>           | TTK      | 0.445 | 0.0018703907 | in gene  |
| <b>USP37_57695</b>        | USP37    | 0.44  | 0.0022729087 | in gene  |
| <b>USP39_10713</b>        | USP39    | 0.435 | 0.0027285043 |          |
| <b>USPL1_10208</b>        | USPL1    | 0.4   | 0.0088403475 |          |
| <b>VN1R1_57191</b>        | VN1R1    | 0.427 | 0.0036413598 |          |
| <b>VRK1_7443</b>          | VRK1     | 0.404 | 0.0077553996 |          |
| <b>WBP11_51729</b>        | WBP11    | 0.409 | 0.006653993  | promoter |
| <b>WBP4_11193</b>         | WBP4     | 0.412 | 0.0062122489 | promoter |
| <b>WDR33_55339</b>        | WDR33    | 0.493 | 0.000234489  | in gene  |
| <b>XG_7499</b>            | XG       | 0.438 | 0.0023825217 |          |
| <b>XPO1_7514</b>          | XPO1     | 0.439 | 0.0023355258 |          |
| <b>XRCC3_7517</b>         | XRCC3    | 0.495 | 0.000210528  |          |
| <b>ZBED4_9889</b>         | ZBED4    | 0.43  | 0.0032556014 |          |
| <b>ZBTB34_403341</b>      | ZBTB34   | 0.407 | 0.0071104348 | promoter |
| <b>ZBTB5_9925</b>         | ZBTB5    | 0.439 | 0.0023516224 |          |
| <b>ZCCHC9_84240</b>       | ZCCHC9   | 0.399 | 0.0091696669 | in gene  |
| <b>ZFP14_57677</b>        | ZFP14    | 0.463 | 0.0009152051 |          |
| <b>ZNF100_163227</b>      | ZNF100   | 0.452 | 0.0013998744 | in gene  |
| <b>ZNF107_51427</b>       | ZNF107   | 0.485 | 0.0003485831 | promoter |
| <b>ZNF10_7556</b>         | ZNF10    | 0.402 | 0.0082108049 |          |
| <b>ZNF253_56242</b>       | ZNF253   | 0.411 | 0.0062591469 |          |
| <b>ZNF273_10793</b>       | ZNF273   | 0.526 | 4,47E+07     |          |
| <b>ZNF345_25850</b>       | ZNF345   | 0.423 | 0.0042284615 | in gene  |
| <b>ZNF37B_100129482</b>   | ZNF37BP  | 0.473 | 0.0006031227 |          |

|                      |        |       |              |          |
|----------------------|--------|-------|--------------|----------|
| <b>ZNF431_170959</b> | ZNF431 | 0.406 | 0.007331712  |          |
| <b>ZNF445_353274</b> | ZNF445 | 0.405 | 0.0074946793 |          |
| <b>ZNF493_284443</b> | ZNF493 | 0.398 | 0.0092735168 |          |
| <b>ZNF502_91392</b>  | ZNF502 | 0.396 | 0.0098156796 |          |
| <b>ZNF529_57711</b>  | ZNF529 | 0.457 | 0.0011560126 |          |
| <b>ZNF567_163081</b> | ZNF567 | 0.432 | 0.0030429442 |          |
| <b>ZNF620_253639</b> | ZNF620 | 0.467 | 0.0007580301 |          |
| <b>ZNF675_171392</b> | ZNF675 | 0.414 | 0.0056319478 |          |
| <b>ZNF708_7562</b>   | ZNF708 | 0.455 | 0.0012716317 |          |
| <b>ZNF70_7621</b>    | ZNF70  | 0.479 | 0.0004491961 |          |
| <b>ZNF77_58492</b>   | ZNF77  | 0.432 | 0.0030380501 |          |
| <b>ZNF823_55552</b>  | ZNF823 | 0.402 | 0.0082885405 |          |
| <b>ZNF92_168374</b>  | ZNF92  | 0.457 | 0.0011492729 |          |
| <b>ZNF93_81931</b>   | ZNF93  | 0.478 | 0.0004735888 | promoter |
| <b>ZWILCH_55055</b>  | ZWILCH | 0.49  | 0.0002700487 |          |

**Table S3.** Functional analysis of the genes co-regulated with DLEU2 RNA in HCC HBV-related patients ( $r>0.3$ ) (TCGA, <https://cancergenome.nih.gov/>)

| NAME                                                        | P-value    | Adjusted p-value | Description                |
|-------------------------------------------------------------|------------|------------------|----------------------------|
| miRNA Regulation of DNA Damage Response_Homo sapiens_WP1530 | 0.0001429  | 0.01045          | WikiPathways 2016          |
| Cytosine methylation_Homo sapiens_WP3585                    | 0.0001741  | 0.01045          | WikiPathways 2016          |
| DNA Damage Response_Homo sapiens_WP707                      | 0.0002594  | 0.01096          | WikiPathways 2016          |
| Gene Expression_Homo sapiens_R-HSA-74160                    | 0.00003057 | 0.001541         | Reactome 2016              |
| Cell Cycle_Homo sapiens_R-HSA-1640170                       | 0.00001853 | 0.004668         | Reactome 2016              |
| DNA metabolic process (GO:0006259)                          | 0.00001814 | 0.01870          | GO Biological Process 2018 |
| mRNA cis splicing, via spliceosome (GO:0045292)             | 0.00007509 | 0.03871          | GO Biological Process 2018 |
| G-quadruplex DNA unwinding (GO:0044806)                     | 0.0001172  | 0.04028          | GO Biological Process 2018 |

**Table S4.** Functional analysis of DLEU2 co-regulated HBx target genes

| NAME                                            | P-value    | Adjusted p-value | Description                |
|-------------------------------------------------|------------|------------------|----------------------------|
| mRNA cis splicing, via spliceosome (GO:0045292) | 1.849e-8   | 0.000003605      | GO Biological Process 2018 |
| mRNA 5'-splice site recognition                 | 0.00005516 | 0.005378         | GO Biological Process 2018 |
| DNA Damage Response                             | 0.005619   | 0.1528           | WikiPathways 2016          |
| G2/M DNA replication checkpoint                 | 0.008224   | 0.2295           | Reactome 2016              |

**Table S5.** Functional analysis of the genes co-regulated with EZH2 RNA in HCC HBV-related patients ( $r>0.3$ ) (TCGA, <https://cancergenome.nih.gov/>)

| NAME                                                               | P-value     | Adjusted p-value | Description                |
|--------------------------------------------------------------------|-------------|------------------|----------------------------|
| DNA Replication                                                    | 0.0001707   | 0.003672         | WikiPathways 2016          |
| Cell Cycle                                                         | 0.00052488  | 0.00752333       | KEGG                       |
| G2/M Checkpoints_Homo sapiens_R-HSA-69481                          | 0.0000057   | 0.000198         | Reactome 2016              |
| Cell Cycle, Mitotic_Homo sapiens_R-HSA-69278                       | 0.00000010  | 0.000001057      | Reactome 2016              |
| M Phase_Homo sapiens_R-HSA-68886                                   | 0.00001511  | 0.0003985        | Reactome 2016              |
| Epigenetic regulation of gene expression_Homo sapiens_R-HSA-212165 | 0.000003012 | 0.0001837        | GO Biological Process 2018 |
| positive regulation of histone methylation (GO:0031062)            | 0.0000563   | 0.001414         | GO Biological Process 2018 |
| mitotic recombination (GO:0006312)                                 | 0.0001044   | 0.0041421        | GO Biological Process 2018 |

**Table S6.** Functional analysis of EZH2 co-regulated HBx target genes

| NAME                                               | P-value        | Adjusted p-value | Description                |
|----------------------------------------------------|----------------|------------------|----------------------------|
| DNA Replication                                    | 0.0000525900   | 0.0028           | WikiPathways 2016          |
| Cell Cycle                                         | 0.0003112      | 0.006536         | WikiPathways 2016          |
| G1 to S cell cycle control                         | 0.000274914    | 0.006536         | WikiPathways 2016          |
| Cell Cycle, Mitotic                                | 0.000000000928 | 0.0000001096     | Reactome 2016              |
| Mitotic G2-G2/M phases_Homo sapiens_R-HSA-453274   | 0.00002466     | 0.000582         | Reactome 2016              |
| mitotic cell cycle phase transition (GO:0044772)   | 0.000000011    | 0.00000703       | GO Biological Process 2018 |
| G1/S transition of mitotic cell cycle (GO:0000082) | 0.00001362     | 0.0010135        | GO Biological Process 2018 |
| mitotic recombination (GO:0006312)                 | 0.0001044      | 0.0041421        | GO Biological Process 2018 |

Table S7

|        | Entrez Gene | OMIN   | Description                                                                                                                                                                                                                                                                                                                                                        |
|--------|-------------|--------|--------------------------------------------------------------------------------------------------------------------------------------------------------------------------------------------------------------------------------------------------------------------------------------------------------------------------------------------------------------------|
| TRIM13 | 10206       | 605661 | - Tripartite Motif Containing 13 (TRIM13) ER resident RING E3 ligase<br>- Regulates NEMO (negative regulator of NF- $\kappa$ B signaling) ubiquitination <sup>1</sup><br>- Putative tumor suppressor <sup>1</sup><br>- Regulates initiation of autophagy during ER stress <sup>2</sup><br>- Negative regulator of MDA5-mediated type I IFN production <sup>3</sup> |
| CCNB2  | 9133        | 602755 | - G2/Mitotic-Specific Cyclin-B2<br>- Negatively associated with the overall survival of patients with HCC <sup>4,5,6</sup>                                                                                                                                                                                                                                         |
| DNMT1  | 1786        | 126375 | - DNA Methyltransferase 1<br>- Upregulated by HBx <sup>7</sup><br>- Pharmacological targeting of DNMT1 inhibits HCC cell growth <sup>8</sup>                                                                                                                                                                                                                       |
| PRC1   | 9055        | 603484 | - Protein Regulator of Cytokinesis 1<br>- High expressions associated with poorer overall survivals in HCC patients <sup>9</sup><br>- Identified as a hub gene, implicated in tumor (T) stage and histologic grade of HCCs <sup>9</sup><br>- Associated with early tumor recurrence in HBV-relate HCC patients <sup>10</sup>                                       |
| POLE2  | 5427        | 602670 | - DNA polymerase epsilon 2 accessory subunit (POLE2)<br>- Highly expressed in lung cancer cell lines <sup>11</sup><br>- POLE mutation causes polymerase proofreading-associated polyposis and is associated to risk of colorectal cancer <sup>12</sup>                                                                                                             |
| ZBTB34 | 403341      | 611692 | - Zinc Finger and BTB Domain-Containing Protein 34<br>- Nuclear localization and putative transcriptional repressor <sup>13</sup>                                                                                                                                                                                                                                  |

1. Tomar D et al. Cell Signal 2014;12:2606-13
2. Tomar D et al. Biochim Biophys Acta 2012;1823:316-26
3. Narayan K et al. J Virol 2014;8:10748-10757
4. Zhang Q et al. Mol Med Rep 2019;19:2479-2488
5. Gao X et al. Biosci Rep 2018;38:Pii BSR20181441
6. Wu M et al. World J Surg Oncol 2019;17:77
7. Zhao Z et al. Oncol Rep 2017;37:2811-2818
8. Bárcena-Varela M et al. Hepatology 2019;69:587-603
9. Li B et al. J Cell Biochem 2019, Feb 1; doi: 10.1002/jcb.28420 [Epub ahead of print]
10. Wang SM et al. Clin Cancer Res 2011;17:6040-51
11. Li J et al. Oncol Rep. 2018;40:2477-2486
12. Chubb D et al. Nat Commun. 2016;7:11883
13. Qi J et al. Mol Cell Biochem 2006;290:159-67



TABLE S8

| ChIP primers           | Forward (5'-3')                    | Reverse (5'-3')        |
|------------------------|------------------------------------|------------------------|
| DLEU2 promoter         | GCTGATAACCAGTGCCACTAA              | CCTCTCAAAGTGCTGGGATTA  |
| TRIM13 promoter        | ACCCAAACTTCCTCAACTGG               | GGAATGGCTCCTCCAGAATTTA |
| CCNB2 promoter         | AACCCCAACACACCAGAAGA               | TTGGGAAAGCAGACGTAGGA   |
| PCR primers            | Forward (5'-3')                    | Reverse (5'-3')        |
| DLEU2 exons 2-4        | ACCTGTAGCAGAGAACCAATT              | TTCCTTGCACTACACCTTTCA  |
| DLEU2 intron1          | CTGTAATCCCAGCACTTTGAGA             | GGTTCCTGTTAGTGCAACTACT |
| MALAT1                 | AGGCGTTGTGCGTAGAGGA                | GGATTTTTACCAACCACTCGC  |
| $\beta$ -Actin         | GCACTCTTCCAGCCTTCC                 | AGGTCTTTGCCGGATGTCC    |
| CCNB2                  | ACCTACTGCTTCTGTCAAACCA             | GCAGAGCAAGGCATCAGAAA   |
| Real Time probes       | Probe                              |                        |
| DLEU1                  | Hs00705554_s1 (Applied)            |                        |
| DLEU2 exons            | Hs00863925_m1 (Applied)            |                        |
| DLEU2 intron 1         | ID APXGUY2 (Applied, probe custom) |                        |
| EZH2                   | Hs00544833_m1 (Applied)            |                        |
| TRIM13                 | Hs00328634_s1 (Applied)            |                        |
| $\beta$ -Actin         | cat.no. 05532957001 (Roche)        |                        |
| GAPDH                  | Hs02758991_g1                      |                        |
| GUS-b                  | Hs99999908_m1                      |                        |
| HBV primers and probes | Forward (5'-3')                    | Reverse (5'-3')        |
| pgRNA                  | GCCTTAGAGTCTCCTGAGCA               | GAGGGAGTTCTTCTTAGG     |
| cccDNA                 | CTCCCCGTCTGTGCCTTCT                | GCCCCAAAGCCACCCAAG     |
|                        | Probe                              |                        |
| pgRNA FRET             | AGTGTGGATTGCACTCCTCCAGC-FL         |                        |
| pgRNA Red640           | ATAGACCACCAAATGCCCTATCTTATCAAC     |                        |
| cccDNA FRET            | GTTACGGTGGTCTCCATGCAACGT-FL        |                        |
| cccDNA Red640          | AGGTGAAGCGAAGTGCACACGGACC          |                        |

### Supplemental Information References

1. Guerrieri F, Belloni L, D'Andrea D, *et al.* Genome-wide identification of direct HBx genomic targets. *BMC Genomics* 2017;**18**:184.
2. Lecluyse EL & Alexandre E. Isolation and culture of primary hepatocytes from resected human liver tissue. *Methods Mol Bio.* 2010;**640**:57-82.
3. Hantz O, Parent R, Durantel D, *et al.* Persistence of the hepatitis B virus covalently closed circular DNA in HepaRG human hepatocyte-like cells. *J Gen Virol* 2009;**90**:127-135.
4. Lucifora J, Arzberger S, Durantel D, *et al.* Hepatitis B virus X protein is essential to initiate and maintain virus replication after infection. *J Hepatol* 2011;**55**:996-1003.
5. Belloni L, Pollicino T, De Nicola F, *et al.* Nuclear HBx binds the HBV minichromosome and modifies the epigenetic regulation of cccDNA function. *Proc. Natl. Acad. Sci.* 2009;**106**:19975–19979.
6. Sperschneider J & Datta A. Dot knot: Pseudoknot prediction using the probability dot plot under a refined energy model. *Nucleic Acids Res* 2018;**38**: e103.
7. Sperschneider J, Datta A, Wise MJ. Heuristic RNA pseudoknot prediction including intramolecular kissing hairpins. *RNA* 2011;**17**:27-38.
8. Popenda M, Szachniuk M, Antczak M, *et al.* Automated 3D structure composition for large RNAs. *Nucleic Acids Res.* 2012;**40**:e112.
9. Dosztányi Z, Csizmok V, Tompa P, *et al.* IUPred: Web server for the prediction of intrinsically unstructured regions of proteins based on estimated energy content. *Bioinformatics* 2005;**21**:3433-3434.
10. Xue B, Dunbrack RL, Williams RW. *et al.* PONDR-FIT: A meta-predictor of intrinsically disordered amino acids. *Biochim. Biophys Acta - Proteins Proteomics* 2010;**1804**:996-1010.
11. Ward JJ, McGuffin LJ, Bryson K, *et al.* The DISOPRED server for the prediction of protein disorder. *Bioinformatics* 2004;**20**:2138-2139.
12. Yang J, Yan R, Roy A *et al.* The I-TASSER suite: Protein structure and function prediction. *Nature Methods* 2015;**12**:7–8.
13. Roy A, Kucukural A, Zhang Y. I-TASSER: A unified platform for automated protein structure and

- function prediction. *Nat Protoc* 2010;**5**:725–738.
14. Zhang Y. I-TASSER server for protein 3D structure prediction. *BMC Bioinformatics* 2008;**9**:40.
  15. Muppirala UK, Honavar VG, Dobbs D. Predicting RNA-Protein Interactions Using Only Sequence Information. *BMC Bioinformatics* 2011;**12**:489.
  16. Bellucci M, Agostini F, Masin M, *et al.* Predicting protein associations with long noncoding RNAs. *Nature Methods* 2011;**8**:444–445.
  17. Cirillo D, Blanco M, Armaos A, *et al.* Quantitative predictions of protein interactions with long noncoding RNAs. *Nature Methods* 2017;**14**:5-6.
  18. Walia RR, Xue LC, Wilkins K *et al.* RNABindRPlus: A predictor that combines machine learning and sequence homology-based methods to improve the reliability of predicted RNA-binding residues in proteins. *PLoS One* 2014;**9**:e97725.
  19. Ritchie DW, Kozakov D & Vajda S. Accelerating and focusing protein-protein docking correlations using multi-dimensional rotational FFT generating functions. *Bioinformatics* 2008;**24**:1865-1873.
  20. Puton T, Kozlowski L, Tuszynska I, *et al.* Computational methods for prediction of protein-RNA interactions. *J. Struct. Biol.* 2012;**179**:261-268.
  21. Tuszynska I, Matelska D, Magnus M, *et al.* Computational modeling of protein-RNA complex structures. *Methods* 2014;**65**:310-319.
  22. Tuszynska I, Magnus M, Jonak K, *et al.* NPDock: A web server for protein-nucleic acid docking. *Nucleic Acids Res* 2015;**43**:W425–W430.
  23. Dominguez C, Boelens R, Bonvin AMJ. HADDOCK: A protein-protein docking approach based on biochemical or biophysical information. *J Am Chem Soc* 2003;**125**:1731–1737.
  24. Van Zundert GCP, Rodrigues JPGLM, Trellet M, *et al.* The HADDOCK2.2 Web Server: User-Friendly Integrative Modeling of Biomolecular Complexes. *J Mol Biol* 2016;**428**:720-725.
  25. Liu F, Somarowthu S, Pyle AM. Visualizing the secondary and tertiary architectural domains of lncRNA RepA. *Nature Chemical Biology* 2017;**13**:282–289.
  26. Yan K, Arfat Y, Li D, *et al.* Structure Prediction: New Insights into Decrypting Long Noncoding RNAs. *Int J Mol Sci* 2016;**17**:132.

27. Miao Z, Adamiak RW, Blanchet MF, *et al.* RNA-Puzzles Round II: assessment of RNA structure prediction programs applied to three large RNA structures. *RNA* 2015;**21**:1066-84.
28. Miao Z, Adamiak RW, Antczak M, *et al.* RNA-Puzzles Round III: 3D RNA structure prediction of five riboswitches and one ribozyme. *RNA* 2017;**23**:655-672.
29. Sperschneider J, Datta A. KnotSeeker: heuristic pseudoknot detection in long RNA sequences. *RNA* 2008;**14**:630-640.
30. Brierley I, Pennell S, Gilbert RJC. Viral RNA pseudoknots: versatile motifs in gene expression and replication. *Nature Reviews Microbiology* 2007;**5**:598–610.
31. Lee SH, Cha EJ, Lim JE, *et al.* Structural characterization of an intrinsically unfolded mini-HBx protein from Hepatitis B Virus. *Mol Cells* 2012;**34**:165-169.
32. Sidhu K, Kumar S, Reddy VS, *et al.* Mass spectrometric determination of disulfide bonds in the biologically active recombinant HBx protein of hepatitis B virus. *Biochemistry* 2014;**22**:4685-95.
33. van Hemert FJ, van de Klundert MAA, Lukashov VV, *et al.* Protein X of Hepatitis B virus: origin and structure similarity with the central domain of DNA glycosylase. *PLoS ONE* 2011;**6**:e23392.
34. Wass MN, Fuentes G, Pons C, *et al.* Towards the prediction of protein interaction partners using physical docking. *Molecular Systems Biology* 2011;**7**:469.
35. Li T, Robert EI, van Breugel PC, *et al.* A promiscuous alpha-helical motif anchors viral hijackers and substrate receptors to the CUL4-DDB1 ubiquitin ligase machinery. *Nat Struct Mol Biol* 2010;**17**:105-11.
36. Yang Y, Chen L, Gu J, *et al.* Recurrently deregulated lncRNAs in hepatocellular carcinoma. *Nat Commun* 2017;**8**:14421.
37. Villa E, Critelli R, Lei B *et al.* Neoangiogenesis-related genes are hallmarks of fast-growing hepatocellular carcinomas and worst survival. Results from a prospective study. *Gut* 2016;**65**:861–869.
